# Supplementary material for: Blue carbon of Mexico, carbon stocks and fluxes: a systematic review
Source: PeerJ. 2020 Apr 6;8:e8790. doi: 10.7717/peerj.8790 (PMC7144590; doi:10.7717/peerj.8790)
Supplement: Data S2 [file peerj-08-8790-s002.xlsx]

## Sheet: Dara_Seagrasses 
ID	REGION	STATE	LOCATION	STATION	SITE	TYPE OF ENVIRONMENT	EXTENSION (ha)	TYPE_MAR	AMP_MAR (m)	PRECIPITATION (mm)	TEMPERATURE	SALINITY	INFLUENCE	IMPACT	LONGITUD	LATITUD	SPECIES	MgC ha_AER	MgC ha_SUB	MgC ha_TOT	MgCO2eq/ha	REFERENCE
ID01	Gulf of Mexico	Veracruz	Sistema Arrecifal Veracruzano	31	Verde	Open	undetermined	Diurnal	Undetermined	Undetermined	Undetermined	36	Influence of rivers Jamapa y Papaloapan	Fishing, tourism and urban development	-96.0694	19.2067	Thalassia testudinum	0.63	48.78	49.41	181.335	Datos del Laboratorio de Producción Primaria del CINVESTAV-IPN Unidad Mérida
ID02	Gulf of Mexico	Veracruz	Sistema Arrecifal Veracruzano	32	Verde	Open	undetermined	Diurnal	Undetermined	Undetermined	Undetermined	36	Influence of rivers Jamapa y Papaloapan	Fishing, tourism and urban development	-96.0685	19.2053	Thalassia testudinum	0.63	48.78	49.41	181.335	Datos del Laboratorio de Producción Primaria del CINVESTAV-IPN Unidad Mérida
ID03	Gulf of Mexico	Veracruz	Sistema Arrecifal Veracruzano	33	Verde	Open	undetermined	Diurnal	Undetermined	Undetermined	Undetermined	37	Influence of rivers Jamapa y Papaloapan	Fishing, tourism and urban development	-96.0674	19.2072	Thalassia testudinum	0.63	48.78	49.41	181.335	Datos del Laboratorio de Producción Primaria del CINVESTAV-IPN Unidad Mérida
ID04	Gulf of Mexico	Veracruz	Sistema Arrecifal Veracruzano	36	Verde	Open	undetermined	Diurnal	Undetermined	Undetermined	Undetermined	36	Influence of rivers Jamapa y Papaloapan	Fishing, tourism and urban development	-96.0702	19.2081	Thalassia testudinum	0.63	48.78	49.41	181.335	Datos del Laboratorio de Producción Primaria del CINVESTAV-IPN Unidad Mérida
ID05	Gulf of Mexico	Veracruz	Sistema Arrecifal Veracruzano	91	Chopas	Open	undetermined	Diurnal	Undetermined	Undetermined	Undetermined	36	Influence of rivers Jamapa y Papaloapan	Fishing, tourism and urban development	-95.9717	19.0943	Thalassia testudinum	1.8	77.63	79.43	291.508	Datos del Laboratorio de Producción Primaria del CINVESTAV-IPN Unidad Mérida
ID06	Gulf of Mexico	Veracruz	Sistema Arrecifal Veracruzano	94	Chopas	Open	undetermined	Diurnal	Undetermined	Undetermined	Undetermined	36	Influence of rivers Jamapa y Papaloapan	Fishing, tourism and urban development	-95.9708	19.0955	Thalassia testudinum	1.8	77.63	79.43	291.508	Datos del Laboratorio de Producción Primaria del CINVESTAV-IPN Unidad Mérida
ID07	Gulf of Mexico	Veracruz	Sistema Arrecifal Veracruzano	95	Chopas	Open	undetermined	Diurnal	Undetermined	Undetermined	Undetermined	36	Influence of rivers Jamapa y Papaloapan	Fishing, tourism and urban development	-95.9728	19.093	Thalassia testudinum	1.8	77.63	79.43	291.508	Datos del Laboratorio de Producción Primaria del CINVESTAV-IPN Unidad Mérida
ID08	Gulf of Mexico	Veracruz	Sistema Arrecifal Veracruzano	97	Chopas	Open	undetermined	Diurnal	Undetermined	Undetermined	Undetermined	36	Influence of rivers Jamapa y Papaloapan	Fishing, tourism and urban development	-95.9739	19.0924	Thalassia testudinum	1.8	77.63	79.43	291.508	Datos del Laboratorio de Producción Primaria del CINVESTAV-IPN Unidad Mérida
ID09	Gulf of Mexico	Veracruz	Sistema Arrecifal Veracruzano	100	Chopas	Open	undetermined	Diurnal	Undetermined	Undetermined	Undetermined	36	Influence of rivers Jamapa y Papaloapan	Fishing, tourism and urban development	-95.975	19.0909	Thalassia testudinum	1.8	77.63	79.43	291.508	Datos del Laboratorio de Producción Primaria del CINVESTAV-IPN Unidad Mérida
ID10	Gulf of Mexico	Veracruz	Sistema Arrecifal Veracruzano	101	Chopas	Open	undetermined	Diurnal	Undetermined	Undetermined	Undetermined	36	Influence of rivers Jamapa y Papaloapan	Fishing, tourism and urban development	-95.9754	19.0905	Thalassia testudinum	1.8	77.63	79.43	291.508	Datos del Laboratorio de Producción Primaria del CINVESTAV-IPN Unidad Mérida
ID11	Gulf of Mexico	Veracruz	Sistema Arrecifal Veracruzano	103	Chopas	Open	undetermined	Diurnal	Undetermined	Undetermined	Undetermined	36	Influence of rivers Jamapa y Papaloapan	Fishing, tourism and urban development	-95.9762	19.09	Thalassia testudinum	1.8	77.63	79.43	291.508	Datos del Laboratorio de Producción Primaria del CINVESTAV-IPN Unidad Mérida
ID12	Gulf of Mexico	Veracruz	Sistema Arrecifal Veracruzano	106	Chopas	Open	undetermined	Diurnal	Undetermined	Undetermined	Undetermined	36	Influence of rivers Jamapa y Papaloapan	Fishing, tourism and urban development	-95.9629	19.0913	Thalassia testudinum	1.8	77.63	79.43	291.508	Datos del Laboratorio de Producción Primaria del CINVESTAV-IPN Unidad Mérida
ID13	Gulf of Mexico	Veracruz	Sistema Arrecifal Veracruzano	107	Chopas	Open	undetermined	Diurnal	Undetermined	Undetermined	Undetermined	36	Influence of rivers Jamapa y Papaloapan	Fishing, tourism and urban development	-95.9638	19.0904	Thalassia testudinum	1.8	77.63	79.43	291.508	Datos del Laboratorio de Producción Primaria del CINVESTAV-IPN Unidad Mérida
ID14	Gulf of Mexico	Veracruz	Sistema Arrecifal Veracruzano	108	Chopas	Open	undetermined	Diurnal	Undetermined	Undetermined	Undetermined	36	Influence of rivers Jamapa y Papaloapan	Fishing, tourism and urban development	-95.9645	19.0896	Thalassia testudinum	1.8	77.63	79.43	291.508	Datos del Laboratorio de Producción Primaria del CINVESTAV-IPN Unidad Mérida
ID15	Gulf of Mexico	Veracruz	Sistema Arrecifal Veracruzano	109	Chopas	Open	undetermined	Diurnal	Undetermined	Undetermined	Undetermined	36	Influence of rivers Jamapa y Papaloapan	Fishing, tourism and urban development	-95.9652	19.0888	Thalassia testudinum	1.8	77.63	79.43	291.508	Datos del Laboratorio de Producción Primaria del CINVESTAV-IPN Unidad Mérida
ID16	Gulf of Mexico	Veracruz	Sistema Arrecifal Veracruzano	131	Rizo	Open	undetermined	Diurnal	Undetermined	Undetermined	Undetermined	36	Influence of rivers Jamapa y Papaloapan	Fishing, tourism and urban development	-95.9282	19.0611	Thalassia testudinum	0.73	49.49	50.22	184.307	Datos del Laboratorio de Producción Primaria del CINVESTAV-IPN Unidad Mérida
ID17	Gulf of Mexico	Veracruz	Sistema Arrecifal Veracruzano	132	Rizo	Open	undetermined	Diurnal	Undetermined	Undetermined	Undetermined	36	Influence of rivers Jamapa y Papaloapan	Fishing, tourism and urban development	-95.9279	19.0623	Thalassia testudinum	0.73	49.49	50.22	184.307	Datos del Laboratorio de Producción Primaria del CINVESTAV-IPN Unidad Mérida
ID18	Gulf of Mexico	Veracruz	Sistema Arrecifal Veracruzano	133	Rizo	Open	undetermined	Diurnal	Undetermined	Undetermined	Undetermined	36	Influence of rivers Jamapa y Papaloapan	Fishing, tourism and urban development	-95.9287	19.062	Thalassia testudinum	0.73	49.49	50.22	184.307	Datos del Laboratorio de Producción Primaria del CINVESTAV-IPN Unidad Mérida
ID19	Gulf of Mexico	Veracruz	Sistema Arrecifal Veracruzano	134	Rizo	Open	undetermined	Diurnal	Undetermined	Undetermined	Undetermined	36	Influence of rivers Jamapa y Papaloapan	Fishing, tourism and urban development	-95.9271	19.0638	Thalassia testudinum	0.73	49.49	50.22	184.307	Datos del Laboratorio de Producción Primaria del CINVESTAV-IPN Unidad Mérida
ID20	Gulf of Mexico	Veracruz	Sistema Arrecifal Veracruzano	135	Rizo	Open	undetermined	Diurnal	Undetermined	Undetermined	Undetermined	36	Influence of rivers Jamapa y Papaloapan	Fishing, tourism and urban development	-95.9274	19.0637	Thalassia testudinum	0.73	49.49	50.22	184.307	Datos del Laboratorio de Producción Primaria del CINVESTAV-IPN Unidad Mérida
ID21	Gulf of Mexico	Veracruz	Sistema Arrecifal Veracruzano	136	Rizo	Open	undetermined	Diurnal	Undetermined	Undetermined	Undetermined	37	Influence of rivers Jamapa y Papaloapan	Fishing, tourism and urban development	-95.9266	19.0654	Thalassia testudinum	0.73	49.49	50.22	184.307	Datos del Laboratorio de Producción Primaria del CINVESTAV-IPN Unidad Mérida
ID22	Gulf of Mexico	Veracruz	Sistema Arrecifal Veracruzano	292	Chopas	Open	undetermined	Diurnal	Undetermined	Undetermined	Undetermined	36	Influence of rivers Jamapa y Papaloapan	Fishing, tourism and urban development	-95.9833	19.092	Thalassia testudinum	1.8	77.63	79.43	291.508	Datos del Laboratorio de Producción Primaria del CINVESTAV-IPN Unidad Mérida
ID23	Gulf of Mexico	Veracruz	Sistema Arrecifal Veracruzano	293	Chopas	Open	undetermined	Diurnal	Undetermined	Undetermined	Undetermined	38	Influence of rivers Jamapa y Papaloapan	Fishing, tourism and urban development	-95.9812	19.0905	Thalassia testudinum	1.8	77.63	79.43	291.508	Datos del Laboratorio de Producción Primaria del CINVESTAV-IPN Unidad Mérida
ID24	Yucatan Peninsula	Quintana Roo	Sian ka'an	BA01	ASCENCION	Closed	undetermined	undetermined	Undetermined	Undetermined	Undetermined	Undetermined	Undetermined	Undetermined	-87.7131	19.6385	Thalassia testudinum	0.0531409	112.266	112.367	412.386	Datos del Laboratorio de Producción Primaria del CINVESTAV-IPN Unidad Mérida
ID25	Yucatan Peninsula	Quintana Roo	Sian ka'an	BA02	ASCENCION	Closed	undetermined	undetermined	Undetermined	Undetermined	Undetermined	19	Undetermined	Undetermined	-87.7207	19.6284	Thalassia testudinum	0.001924	338.705	338.776	1243.31	Datos del Laboratorio de Producción Primaria del CINVESTAV-IPN Unidad Mérida
ID26	Yucatan Peninsula	Quintana Roo	Sian ka'an	BA03	ASCENCION	Closed	undetermined	undetermined	Undetermined	Undetermined	Undetermined	28	Undetermined	Undetermined	-87.689	19.5808	Thalassia testudinum	0.0913901	124.332	125.145	459.283	Datos del Laboratorio de Producción Primaria del CINVESTAV-IPN Unidad Mérida
ID27	Yucatan Peninsula	Quintana Roo	Sian ka'an	BA04	ASCENCION	Closed	undetermined	undetermined	Undetermined	Undetermined	Undetermined	35	Undetermined	Undetermined	-87.6742	19.5675	Thalassia testudinum	0.223184	290.871	293.71	1077.92	Datos del Laboratorio de Producción Primaria del CINVESTAV-IPN Unidad Mérida
ID28	Yucatan Peninsula	Quintana Roo	Sian ka'an	BA05	ASCENCION	Closed	undetermined	undetermined	Undetermined	Undetermined	Undetermined	34	Undetermined	Undetermined	-87.6671	19.557	N/A		269.436	269.436	988.83	Datos del Laboratorio de Producción Primaria del CINVESTAV-IPN Unidad Mérida
ID29	Yucatan Peninsula	Quintana Roo	Sian ka'an	BA06	ASCENCION	Closed	undetermined	undetermined	Undetermined	Undetermined	Undetermined	Undetermined	Undetermined	Undetermined	-87.6522	19.5502	Thalassia testudinum	0.0531409	156.516	156.617	574.786	Datos del Laboratorio de Producción Primaria del CINVESTAV-IPN Unidad Mérida
ID30	Yucatan Peninsula	Quintana Roo	Sian ka'an	BA07	ASCENCION	Closed	undetermined	undetermined	Undetermined	Undetermined	Undetermined	37	Undetermined	Undetermined	-87.6331	19.5416	Thalassia testudinum	0.02405	110.659	110.872	406.9	Datos del Laboratorio de Producción Primaria del CINVESTAV-IPN Unidad Mérida
ID31	Yucatan Peninsula	Quintana Roo	Sian ka'an	BA08	ASCENCION	Closed	undetermined	undetermined	Undetermined	Undetermined	Undetermined	Undetermined	Undetermined	Undetermined	-87.6264	19.5505	Thalassia testudinum	0.0531409	52.7864	52.8874	194.097	Datos del Laboratorio de Producción Primaria del CINVESTAV-IPN Unidad Mérida
ID32	Yucatan Peninsula	Quintana Roo	Sian ka'an	BA09	ASCENCION	Closed	undetermined	undetermined	Undetermined	Undetermined	Undetermined	35	Undetermined	Undetermined	-87.6081	19.5655	Thalassia testudinum	0.0625301	147.65	147.846	542.596	Datos del Laboratorio de Producción Primaria del CINVESTAV-IPN Unidad Mérida
ID33	Yucatan Peninsula	Quintana Roo	Sian ka'an	BA10	ASCENCION	Closed	undetermined	undetermined	Undetermined	Undetermined	Undetermined	36	Undetermined	Undetermined	-87.6149	19.5933	N/A		231.97	231.97	851.329	Datos del Laboratorio de Producción Primaria del CINVESTAV-IPN Unidad Mérida
ID34	Yucatan Peninsula	Quintana Roo	Sian ka'an	BA11	ASCENCION	Closed	undetermined	undetermined	Undetermined	Undetermined	Undetermined	Undetermined	Undetermined	Undetermined	-87.5973	19.5769	N/A		98.6172	98.6172	361.925	Datos del Laboratorio de Producción Primaria del CINVESTAV-IPN Unidad Mérida
ID35	Yucatan Peninsula	Quintana Roo	Sian ka'an	BA12	ASCENCION	Closed	undetermined	undetermined	Undetermined	Undetermined	Undetermined	38	Undetermined	Undetermined	-87.6198	19.6112	N/A		86.0457	86.0457	315.788	Datos del Laboratorio de Producción Primaria del CINVESTAV-IPN Unidad Mérida
ID36	Yucatan Peninsula	Quintana Roo	Sian ka'an	BA13	ASCENCION	Closed	undetermined	undetermined	Undetermined	Undetermined	Undetermined	36	Undetermined	Undetermined	-87.6257	19.6448	Thalassia testudinum	0.0679173	208.749	208.866	766.538	Datos del Laboratorio de Producción Primaria del CINVESTAV-IPN Unidad Mérida
ID37	Yucatan Peninsula	Quintana Roo	Sian ka'an	BA14	ASCENCION	Closed	undetermined	undetermined	Undetermined	Undetermined	Undetermined	Undetermined	Undetermined	Undetermined	-87.5602	19.5943	Thalassia testudinum	0.0679173	118.316	118.433	434.649	Datos del Laboratorio de Producción Primaria del CINVESTAV-IPN Unidad Mérida
ID38	Yucatan Peninsula	Quintana Roo	Sian ka'an	BA15	ASCENCION	Closed	undetermined	undetermined	Undetermined	Undetermined	Undetermined	40	Undetermined	Undetermined	-87.5214	19.6058	Thalassia testudinum	0.026936	161.954	162.471	596.269	Datos del Laboratorio de Producción Primaria del CINVESTAV-IPN Unidad Mérida
ID39	Yucatan Peninsula	Quintana Roo	Sian ka'an	BA16	ASCENCION	Closed	undetermined	undetermined	Undetermined	Undetermined	Undetermined	Undetermined	Undetermined	Undetermined	-87.4964	19.6137	Thalassia testudinum	0.0679173	188.431	188.548	691.972	Datos del Laboratorio de Producción Primaria del CINVESTAV-IPN Unidad Mérida
ID40	Yucatan Peninsula	Quintana Roo	Sian ka'an	BA17	ASCENCION	Closed	undetermined	undetermined	Undetermined	Undetermined	Undetermined	37	Undetermined	Undetermined	-87.5295	19.6252	Thalassia testudinum	0.0625301	202.301	203.777	747.863	Datos del Laboratorio de Producción Primaria del CINVESTAV-IPN Unidad Mérida
ID41	Yucatan Peninsula	Quintana Roo	Sian ka'an	BA18	ASCENCION	Closed	undetermined	undetermined	Undetermined	Undetermined	Undetermined	Undetermined	Undetermined	Undetermined	-87.4742	19.6125	Thalassia testudinum	0.0863877	106.215	106.352	390.313	Datos del Laboratorio de Producción Primaria del CINVESTAV-IPN Unidad Mérida
ID42	Yucatan Peninsula	Quintana Roo	Sian ka'an	BA19	ASCENCION	Closed	undetermined	undetermined	Undetermined	Undetermined	Undetermined	40	Undetermined	Undetermined	-87.4703	19.6266	N/A		23.673	23.673	86.8797	Datos del Laboratorio de Producción Primaria del CINVESTAV-IPN Unidad Mérida
ID43	Yucatan Peninsula	Quintana Roo	Sian ka'an	BA20	ASCENCION	Closed	undetermined	undetermined	Undetermined	Undetermined	Undetermined	Undetermined	Undetermined	Undetermined	-87.4567	19.6292	Thalassia testudinum	0.0679173	42.7352	42.8525	157.268	Datos del Laboratorio de Producción Primaria del CINVESTAV-IPN Unidad Mérida
ID44	Yucatan Peninsula	Quintana Roo	Sian ka'an	BA21	ASCENCION	Closed	undetermined	undetermined	Undetermined	Undetermined	Undetermined	Undetermined	Undetermined	Undetermined	-87.4737	19.6459	N/A		372.481	372.481	1367	Datos del Laboratorio de Producción Primaria del CINVESTAV-IPN Unidad Mérida
ID45	Yucatan Peninsula	Quintana Roo	Sian ka'an	BA22	ASCENCION	Closed	undetermined	undetermined	Undetermined	Undetermined	Undetermined	38	Undetermined	Undetermined	-87.4599	19.6573	Thalassia testudinum	0.329004	262.83	266.671	978.681	Datos del Laboratorio de Producción Primaria del CINVESTAV-IPN Unidad Mérida
ID46	Yucatan Peninsula	Quintana Roo	Sian ka'an	BA23	ASCENCION	Closed	undetermined	undetermined	Undetermined	Undetermined	Undetermined	Undetermined	Undetermined	Undetermined	-87.4743	19.6895	N/A		89.133	89.133	327.118	Datos del Laboratorio de Producción Primaria del CINVESTAV-IPN Unidad Mérida
ID47	Yucatan Peninsula	Quintana Roo	Sian ka'an	BA24	ASCENCION	Closed	undetermined	undetermined	Undetermined	Undetermined	Undetermined	Undetermined	Undetermined	Undetermined	-87.4911	19.6982	N/A		189.935	189.935	697.061	Datos del Laboratorio de Producción Primaria del CINVESTAV-IPN Unidad Mérida
ID48	Yucatan Peninsula	Quintana Roo	Sian ka'an	BA25	ASCENCION	Closed	undetermined	undetermined	Undetermined	Undetermined	Undetermined	37	Undetermined	Undetermined	-87.5054	19.7076	Thalassia testudinum	0.0692641	193.361	193.8	711.244	Datos del Laboratorio de Producción Primaria del CINVESTAV-IPN Unidad Mérida
ID49	Yucatan Peninsula	Quintana Roo	Sian ka'an	BA26	ASCENCION	Closed	undetermined	undetermined	Undetermined	Undetermined	Undetermined	Undetermined	Undetermined	Undetermined	-87.6361	19.6892	Thalassia testudinum	0.0679173	22.508	22.6253	83.0348	Datos del Laboratorio de Producción Primaria del CINVESTAV-IPN Unidad Mérida
ID50	Yucatan Peninsula	Quintana Roo	Sian ka'an	BA27	ASCENCION	Closed	undetermined	undetermined	Undetermined	Undetermined	Undetermined	Undetermined	Undetermined	Undetermined	-87.6198	19.7104	Thalassia testudinum	0.0679173	57.2868	57.4041	210.673	Datos del Laboratorio de Producción Primaria del CINVESTAV-IPN Unidad Mérida
ID51	Yucatan Peninsula	Quintana Roo	Sian ka'an	BA28	ASCENCION	Closed	undetermined	undetermined	Undetermined	Undetermined	Undetermined	35	Undetermined	Undetermined	-87.5964	19.7494	Thalassia testudinum	0.0779221	64.4878	64.6465	237.253	Datos del Laboratorio de Producción Primaria del CINVESTAV-IPN Unidad Mérida
ID52	Yucatan Peninsula	Quintana Roo	Sian ka'an	BA29	ASCENCION	Closed	undetermined	undetermined	Undetermined	Undetermined	Undetermined	Undetermined	Undetermined	Undetermined	-87.5794	19.7743	Thalassia testudinum	0.31265	106.592	108.646	398.73	Datos del Laboratorio de Producción Primaria del CINVESTAV-IPN Unidad Mérida
ID53	Yucatan Peninsula	Quintana Roo	Sian ka'an	BA30	ASCENCION	Closed	undetermined	undetermined	Undetermined	Undetermined	Undetermined	35	Undetermined	Undetermined	-87.5617	19.7931	Thalassia testudinum	0.32708	51.0676	52.0565	191.047	Datos del Laboratorio de Producción Primaria del CINVESTAV-IPN Unidad Mérida
ID54	Yucatan Peninsula	Quintana Roo	Sian ka'an	BA31	ASCENCION	Closed	undetermined	undetermined	Undetermined	Undetermined	Undetermined	Undetermined	Undetermined	Undetermined	-87.5335	19.7906	N/A		90.6638	90.6638	332.736	Datos del Laboratorio de Producción Primaria del CINVESTAV-IPN Unidad Mérida
ID55	Yucatan Peninsula	Quintana Roo	Sian ka'an	BA32	ASCENCION	Closed	undetermined	undetermined	Undetermined	Undetermined	Undetermined	Undetermined	Undetermined	Undetermined	-87.5107	19.7954	N/A		56.6355	56.6355	207.852	Datos del Laboratorio de Producción Primaria del CINVESTAV-IPN Unidad Mérida
ID56	Yucatan Peninsula	Quintana Roo	Sian ka'an	BA33	ASCENCION	Closed	undetermined	undetermined	Undetermined	Undetermined	Undetermined	38	Undetermined	Undetermined	-87.4852	19.7874	Thalassia testudinum	0.16354	226.621	229.651	842.819	Datos del Laboratorio de Producción Primaria del CINVESTAV-IPN Unidad Mérida
ID57	Yucatan Peninsula	Quintana Roo	Sian ka'an	BA34	ASCENCION	Closed	undetermined	undetermined	Undetermined	Undetermined	Undetermined	37	Undetermined	Undetermined	-87.4787	19.7782	Thalassia testudinum	0.381914	29.277	29.7417	109.152	Datos del Laboratorio de Producción Primaria del CINVESTAV-IPN Unidad Mérida
ID58	Yucatan Peninsula	Quintana Roo	Sian ka'an	BA35	ASCENCION	Closed	undetermined	undetermined	Undetermined	Undetermined	Undetermined	Undetermined	Undetermined	Undetermined	-87.4725	19.7746	Thalassia testudinum	0.344974	275.084	275.508	1011.11	Datos del Laboratorio de Producción Primaria del CINVESTAV-IPN Unidad Mérida
ID59	Yucatan Peninsula	Quintana Roo	Sian ka'an	BA36	ASCENCION	Closed	undetermined	undetermined	Undetermined	Undetermined	Undetermined	37	Undetermined	Undetermined	-87.4663	19.7786	Thalassia testudinum	0.228956	245.783	3.86532	14.1857	Datos del Laboratorio de Producción Primaria del CINVESTAV-IPN Unidad Mérida
ID60	Yucatan Peninsula	Quintana Roo	Sian ka'an	BA37	ASCENCION	Closed	undetermined	undetermined	Undetermined	Undetermined	Undetermined	Undetermined	Undetermined	Undetermined	-87.5633	19.6609	Thalassia testudinum	0.0679173	167.907	168.025	616.65	Datos del Laboratorio de Producción Primaria del CINVESTAV-IPN Unidad Mérida
ID61	Yucatan Peninsula	Quintana Roo	Sian ka'an	BA38	ASCENCION	Closed	undetermined	undetermined	Undetermined	Undetermined	Undetermined	Undetermined	Undetermined	Undetermined	-87.5682	19.6261	Thalassia testudinum	0.0531409	133.595	133.696	490.665	Datos del Laboratorio de Producción Primaria del CINVESTAV-IPN Unidad Mérida
ID62	Yucatan Peninsula	Quintana Roo	Sian ka'an	BA39	ASCENCION	Closed	undetermined	undetermined	Undetermined	Undetermined	Undetermined	Undetermined	Undetermined	Undetermined	-87.5327	19.6851	Thalassia testudinum	0.0531409	299.95	300.051	1101.19	Datos del Laboratorio de Producción Primaria del CINVESTAV-IPN Unidad Mérida
ID63	Yucatan Peninsula	Quintana Roo	Sian ka'an	BA40	ASCENCION	Closed	undetermined	undetermined	Undetermined	Undetermined	Undetermined	36	Undetermined	Undetermined	-87.5608	19.7015	Thalassia testudinum	0.0679173	187.386	187.503	688.137	Datos del Laboratorio de Producción Primaria del CINVESTAV-IPN Unidad Mérida
ID64	Yucatan Peninsula	Quintana Roo	Sian ka'an	BA40	ASCENCION	Closed	undetermined	undetermined	Undetermined	Undetermined	Undetermined	Undetermined	Undetermined	Undetermined	-87.5608	19.7015	Halodule wrightii	0.0679173	187.386	187.503	688.137	Datos del Laboratorio de Producción Primaria del CINVESTAV-IPN Unidad Mérida
ID65	Yucatan Peninsula	Quintana Roo	Sian ka'an	BA41	ASCENCION	Closed	undetermined	undetermined	Undetermined	Undetermined	Undetermined	Undetermined	Undetermined	Undetermined	-87.5713	19.7265	N/A		158.068	158.068	580.11	Datos del Laboratorio de Producción Primaria del CINVESTAV-IPN Unidad Mérida
ID66	Yucatan Peninsula	Quintana Roo	Sian ka'an	BA42	ASCENCION	Closed	undetermined	undetermined	Undetermined	Undetermined	Undetermined	Undetermined	Undetermined	Undetermined	-87.5274	19.7273	N/A		95.6067	95.6067	350.876	Datos del Laboratorio de Producción Primaria del CINVESTAV-IPN Unidad Mérida
ID67	Yucatan Peninsula	Quintana Roo	Sian ka'an	BA43	ASCENCION	Closed	undetermined	undetermined	Undetermined	Undetermined	Undetermined	37	Undetermined	Undetermined	-87.5138	19.7708	N/A		179.896	179.896	660.219	Datos del Laboratorio de Producción Primaria del CINVESTAV-IPN Unidad Mérida
ID68	Yucatan Peninsula	Quintana Roo	Sian ka'an	BA44	ASCENCION	Closed	undetermined	undetermined	Undetermined	Undetermined	Undetermined	36	Undetermined	Undetermined	-87.4726	19.7383	Halodule wrightii	0.0531409	411.267	411.368	1509.72	Datos del Laboratorio de Producción Primaria del CINVESTAV-IPN Unidad Mérida
ID69	Yucatan Peninsula	Quintana Roo	Sian ka'an	BA45	ASCENCION	Closed	undetermined	undetermined	Undetermined	Undetermined	Undetermined	Undetermined	Undetermined	Undetermined	-87.4739	19.7059	Thalassia testudinum	0.104858	228.156	228.314	837.913	Datos del Laboratorio de Producción Primaria del CINVESTAV-IPN Unidad Mérida
ID70	Yucatan Peninsula	Campeche	Campeche-isla arenas	E14	PETENES	Open	undetermined	undetermined	Undetermined	Undetermined	Undetermined	42	Undetermined	Undetermined	-90.4731	19.9892	Thalassia testudinum	1.85281	11.6626	20.5987	75.5971	Datos del Laboratorio de Producción Primaria del CINVESTAV-IPN Unidad Mérida
ID71	Yucatan Peninsula	Campeche	Campeche-isla arenas	E15	PETENES	Open	undetermined	undetermined	Undetermined	Undetermined	Undetermined	45	Undetermined	Undetermined	-90.4826	19.9906	Thalassia testudinum	0.0827321	79.3034	80.4828	295.372	Datos del Laboratorio de Producción Primaria del CINVESTAV-IPN Unidad Mérida
ID72	Yucatan Peninsula	Campeche	Campeche-isla arenas	E16	PETENES	Open	undetermined	undetermined	Undetermined	Undetermined	Undetermined	42	Undetermined	Undetermined	-90.4882	19.9896	Thalassia testudinum	0.441558	40.5167	44.8832	164.721	Datos del Laboratorio de Producción Primaria del CINVESTAV-IPN Unidad Mérida
ID73	Yucatan Peninsula	Campeche	Campeche-isla arenas	E17	PETENES	Open	undetermined	undetermined	Undetermined	Undetermined	Undetermined	42	Undetermined	Undetermined	-90.4967	19.9905	Thalassia testudinum	0.122174	84.1398	88.1177	323.392	Datos del Laboratorio de Producción Primaria del CINVESTAV-IPN Unidad Mérida
ID74	Yucatan Peninsula	Campeche	Campeche-isla arenas	E18	PETENES	Open	undetermined	undetermined	Undetermined	Undetermined	Undetermined	42	Undetermined	Undetermined	-90.5054	19.9896	Thalassia testudinum	0.318422	17.6956	21.4223	78.62	Datos del Laboratorio de Producción Primaria del CINVESTAV-IPN Unidad Mérida
ID75	Yucatan Peninsula	Campeche	Campeche-isla arenas	E19	PETENES	Open	undetermined	undetermined	Undetermined	Undetermined	Undetermined	41	Undetermined	Undetermined	-90.5296	19.9904	Thalassia testudinum	0.141414	26.8583	30.6746	112.576	Datos del Laboratorio de Producción Primaria del CINVESTAV-IPN Unidad Mérida
ID76	Yucatan Peninsula	Campeche	Campeche-isla arenas	E20	PETENES	Open	undetermined	undetermined	Undetermined	Undetermined	Undetermined	42	Undetermined	Undetermined	-90.5181	19.9911	Thalassia testudinum	0.175084	102.047	105.657	387.759	Datos del Laboratorio de Producción Primaria del CINVESTAV-IPN Unidad Mérida
ID77	Yucatan Peninsula	Campeche	Campeche-isla arenas	E21	PETENES	Open	undetermined	undetermined	Undetermined	Undetermined	Undetermined	40	Undetermined	Undetermined	-90.5569	19.9903	Thalassia testudinum	0.278018	104.976	106.972	392.587	Datos del Laboratorio de Producción Primaria del CINVESTAV-IPN Unidad Mérida
ID78	Yucatan Peninsula	Campeche	Campeche-isla arenas	E22	PETENES	Open	undetermined	undetermined	Undetermined	Undetermined	Undetermined	40	Undetermined	Undetermined	-90.5681	19.9921	Thalassia testudinum	0.337662	132.747	137.304	503.906	Datos del Laboratorio de Producción Primaria del CINVESTAV-IPN Unidad Mérida
ID79	Yucatan Peninsula	Campeche	Campeche-isla arenas	E23	PETENES	Open	undetermined	undetermined	Undetermined	Undetermined	Undetermined	40	Undetermined	Undetermined	-90.5903	19.9932	Syringodium filiforme	0.258778	148.617	150.937	553.939	Datos del Laboratorio de Producción Primaria del CINVESTAV-IPN Unidad Mérida
ID80	Yucatan Peninsula	Campeche	Campeche-isla arenas	E24	PETENES	Open	undetermined	undetermined	Undetermined	Undetermined	Undetermined	40	Undetermined	Undetermined	-90.5904	19.9902	Thalassia testudinum	0.119288	127.965	129.274	474.434	Datos del Laboratorio de Producción Primaria del CINVESTAV-IPN Unidad Mérida
ID81	North Pacific	Baja California	Estero de Punta Banda	EST01	Campo Chanoc	Closed	2393	SemiDiurnal	Undetermined	296	Undetermined	37.4	Rills Las Ánimas, el Zorrillo y San Carlos	Fishing and ecotourism	-116.6	31.7333	Zostera marina		133.751	133.751	490.866	Sinicrope Talley, T., Dayton, K. and Ibarra-Obando, S. 2000. Tidal flat macrofaunal communities and their associated environments in estuaries of southern california and northern Baja California, Mexico. Estuaries, Vol. 23 No. 1. pp. 97-114
ID82	North Pacific	Baja California	Bahia San Quintin	EST02	Bahia San Quintin	Closed	4200	Mixed semiDiurnal	2	296	27	34	Exchange of water, salt, nutrients and organic matter with the sea	Tourism	-115.95	30.4	Zostera marina		243.001	243.001	891.814	Sinicrope Talley, T., Dayton, K. and Ibarra-Obando, S. 2000. Tidal flat macrofaunal communities and their associated environments in estuaries of southern california and northern Baja California, Mexico. Estuaries, Vol. 23 No. 1. pp. 97-114
ID83	North Pacific	Baja California	Bahia San Quintin	EST03	Bahia Falsa	Closed	4200	Mixed semiDiurnal	2	296	27	34	Exchange of water, salt, nutrients and organic matter with the sea	Tourism	-115.95	30.4	Zostera marina	0.6125		0.6125	2.24787	Quiroz-Vazquez, P., Ibarra-Obando, S. and Meling-Lopez, A. 2005. Composition if the epifaunal community associated with the seagrass Zostera marina in San Quintin Bay Baja California. Bulletin of Southern California Academy of Sciences: Vol 104: Iss. 2.
ID84	North Pacific	Baja California	Bahia San Quintin	EST04	Bahia San Quintin	Closed	4200	Mixed semiDiurnal	2	296	27	34	Exchange of water, salt, nutrients and organic matter with the sea	Tourism	-115.95	30.4	Zostera marina	0.303333	30.0956	30.3989	111.564	Jorgensen, P., Ibarra-Obando, S. and Carriquiry, J. 2007. Top-down and bottom-up stabilizing mechanisms in eelgrass meadows differentially affected by coastal upwelling. Marine Ecology Progress Series. Vol. 333: 81-93.
ID85	North Pacific	Baja California	Bahia San Quintin	EST05	Base de la Y	Closed	4200	Mixed semiDiurnal	2	296	27	34	Exchange of water, salt, nutrients and organic matter with the sea	Tourism	-115.95	30.4	Zostera marina	0.77		0.77	2.8259	Hernandez Sanchez, G. 2014. Identificación de las fuentes de nitrógeno para pastos marinos y macroalgas en bahía de San Quintín bajo condiciones de surgencias y no surgencia mediante análisis de isótopos estables de nitrógeno. Tesis de Maestria CICESE. Baja California, México. 88pp.
ID86	North Pacific	Baja California	Bahia San Quintin	EST06	Bahia Falsa	Closed	4200	Mixed semiDiurnal	2	296	27	34	Exchange of water, salt, nutrients and organic matter with the sea	Tourism	-115.95	30.4	Zostera marina	1.1305		1.1305	4.14893	Hernandez Sanchez, G. 2014. Identificación de las fuentes de nitrógeno para pastos marinos y macroalgas en bahía de San Quintín bajo condiciones de surgencias y no surgencia mediante análisis de isótopos estables de nitrógeno. Tesis de Maestria CICESE. Baja California, México. 88pp.
ID87	North Pacific	Baja California	Bahia San Quintin	EST07	San Quintin	Closed	4200	Mixed semiDiurnal	2	296	27	34	Exchange of water, salt, nutrients and organic matter with the sea	Tourism	-115.95	30.4	Zostera marina	1.155		1.155	4.23885	Hernandez Sanchez, G. 2014. Identificación de las fuentes de nitrógeno para pastos marinos y macroalgas en bahía de San Quintín bajo condiciones de surgencias y no surgencia mediante análisis de isótopos estables de nitrógeno. Tesis de Maestria CICESE. Baja California, México. 88pp.
ID88	North Pacific	Baja California	Bahia San Quintin	EST08	Bahia San Quintin	Closed	4200	Mixed semiDiurnal	2	296	27	34	Exchange of water, salt, nutrients and organic matter with the sea	Tourism	-115.95	30.4	Zostera marina	0.0303333	29.4966	29.5269	108.364	Jorgensen, P. 2006. Control de Zostera marina por consumidores y recursos en praderas sumergidas bajo diferentes regímenes de fertilización natural. Tesis Doctoral. CICESE. Baja California, México. 190 pp.
ID89	North Pacific	Baja California	Bahia San Quintin	EST09	Bahia Falsa cabezo	Closed	4200	Mixed semiDiurnal	2	296	27	34	Exchange of water, salt, nutrients and organic matter with the sea	Tourism	-115.95	30.4	Zostera marina	0.437185		0.437185	1.60447	Villegas Martínez. K. 2015. Cambios estequiometricos de las hojas del pasto marino Zostera marina en Bahia San Quintin: efectos sobre los mesoherbívoros. Tesis de Maestria. CICESE. Baja California, México. 98 pp.
ID90	North Pacific	Baja California	Bahia San Quintin	EST10	Bahia Falsa centro	Closed	4200	Mixed semiDiurnal	2	296	27	34	Exchange of water, salt, nutrients and organic matter with the sea	Tourism	-115.95	30.4	Zostera marina	0.76853		0.76853	2.82051	Villegas Martínez. K. 2015. Cambios estequiometricos de las hojas del pasto marino Zostera marina en Bahia San Quintin: efectos sobre los mesoherbívoros. Tesis de Maestria. CICESE. Baja California, México. 98 pp.
ID91	Yucatan Peninsula	Yucatan	Dzilam de Bravo	EST100	Laguna de Dzilam	Closed	940	Diurnal	1.2	601.8	31	26.5	Exchange with marine zone and underground water discharges. Low intensity waves.	Fishing and ecotourism	-88.8924	21.4067	Halodule wrightii	0.92		0.92	3.3764	Kantún Manzano, C. y Herrera-Silveira, J.A. 2014. Influencia de las descargas de agua subterránea en los almacenes de carbono azul en dos praderas de pastos marinos en Yucatán. En: Paz, F., J. Wong. (editores). 2015. Estado Actual del Conocimiento del Ciclo del Carbono y sus Interacciones en México: Síntesis a 2014. Serie Síntesis Nacionales. Programa Mexicano del Carbono en colaboración con el C…
ID92	Yucatan Peninsula	Yucatan	Santa Clara	EST101	Costa	Open	undetermined	Mixed semiDiurnal	Undetermined	444	30.1	35.6	Undetermined	Urban Development	-88.9972	21.3849	Syringodium filiforme	1.01		1.01	3.7067	Kantún Manzano, C. y Herrera-Silveira, J.A. 2014. Influencia de las descargas de agua subterránea en los almacenes de carbono azul en dos praderas de pastos marinos en Yucatán. En: Paz, F., J. Wong. (editores). 2015. Estado Actual del Conocimiento del Ciclo del Carbono y sus Interacciones en México: Síntesis a 2014. Serie Síntesis Nacionales. Programa Mexicano del Carbono en colaboración con el C…
ID93	Yucatan Peninsula	Yucatan	Santa Clara	EST102	Costa	Open	undetermined	Mixed semiDiurnal	Undetermined	444	30.1	35.6	Undetermined	Urban Development	-88.9972	21.3849	Halodule wrightii	1.01		1.01	3.7067	Kantún Manzano, C. y Herrera-Silveira, J.A. 2014. Influencia de las descargas de agua subterránea en los almacenes de carbono azul en dos praderas de pastos marinos en Yucatán. En: Paz, F., J. Wong. (editores). 2015. Estado Actual del Conocimiento del Ciclo del Carbono y sus Interacciones en México: Síntesis a 2014. Serie Síntesis Nacionales. Programa Mexicano del Carbono en colaboración con el C…
ID94	Yucatan Peninsula	Yucatan	Dzilam de Bravo	EST103	Costa	Open	undetermined	Diurnal	1.2	601.8	29.8	36.3	Exchange with marine zone and underground water discharges. Low intensity waves.	Fishing and ecotourism	-88.8924	21.4067	Thalassia testudinum	0.46	255.75	256.21	940.291	Mendoza-Martínez, J.E. 2017. Captura y Emisiones de Carbono en pastos marinos sometidos a perturbaciones naturales. Tesis de Maestría. Centro de Investigación y de estudios Avanzados del Instituto Politécnico Nacional CINVESTAV. Mérida , Yucatan. 98 pp.
ID95	Yucatan Peninsula	Yucatan	Dzilam de Bravo	EST104	Costa	Open	undetermined	Diurnal	1.2	601.8	29.8	36.3	Exchange with marine zone and underground water discharges. Low intensity waves.	Fishing and ecotourism	-88.8924	21.4067	Halodule wrightii	0.46	255.75	256.21	940.291	Mendoza-Martínez, J.E. 2017. Captura y Emisiones de Carbono en pastos marinos sometidos a perturbaciones naturales. Tesis de Maestría. Centro de Investigación y de estudios Avanzados del Instituto Politécnico Nacional CINVESTAV. Mérida , Yucatan. 98 pp.
ID96	Yucatan Peninsula	Quintana Roo	Laguna Yalahau	EST105	Holbox	Closed	27500	undetermined	Undetermined	1368.3	27.6	35.9	Undetermined	Fishing and ecotourism	-87.329	21.4436	Thalassia testudinum	4.215		4.215	15.469	May-Kú, M. A., Ardisson, P. L., and Ordónez-López, U. (2010). Morphological variation of Thalassia testudinum in two shallow coastal environments from the southeastern Gulf of Mexico. Botanica Marina, 53(5), 449-455.
ID97	Yucatan Peninsula	Quintana Roo	Puerto Morelos	EST106	Laguna de Puerto Morelos	Closed	9066	Mixed semiDiurnal	Undetermined	1041	27.4	36.3	Undetermined	Ecotourism	-86.825	20.9044	Thalassia testudinum		98.6	98.6	361.862	Calva-Benítez, L. G., y Torres-Alvarado, R. 2011. Carbono orgánico y características texturales de sedimentos en áreas del pasto marino Thalassia testudinum en ecosistemas costeros del sureste del golfo de México. Universidad y ciencia, 27(2), 133-144.
ID98	Yucatan Peninsula	Quintana Roo	Mahahual	EST107	Mahahual	Open	undetermined	Mixed semiDiurnal	0.17	1249	29.9	36.2	Undetermined	Fishing, tourism and urban development	-87.7142	18.7038	Thalassia testudinum		76.85	76.85	282.039	Calva-Benítez, L. G., y Torres-Alvarado, R. 2011. Carbono orgánico y características texturales de sedimentos en áreas del pasto marino Thalassia testudinum en ecosistemas costeros del sureste del golfo de México. Universidad y ciencia, 27(2), 133-144.
ID99	Yucatan Peninsula	Quintana Roo	Laguna Yalahau	EST108	Holbox	Closed	27500	undetermined	Undetermined	1368.3	27.6	35.9	Undetermined	Fishing and ecotourism	-87.2345	21.4816	Thalassia testudinum	2.31647		2.31647	8.50146	Ordóñez-López, U., y García-Hernández, V. D. (2005). Ictiofauna juvenil asociada a Thalassia testudinum en laguna Yalahau, Quintana Roo. Hidrobiológica, 15(2), 195-204.
ID100	Yucatan Peninsula	Quintana Roo	Puerto Morelos	EST109	Laguna de Puerto Morelos	Closed	9066	undetermined	Undetermined	1041	27.4	36.3	Undetermined	Ecotourism	-86.825	20.9044	Thalassia testudinum	0.62335		0.62335	2.28769	Enríquez, S., and Pantoja-Reyes, N. I. (2005). Form-function analysis of the effect of canopy morphology on leaf self-shading in the seagrass Thalassia testudinum. Oecologia, 145(2), 234-242.
ID101	North Pacific	Baja California	Bahia San Quintin	EST11	Bahia Falsa boca	Closed	4200	Mixed semiDiurnal	2	296	27	34	Exchange of water, salt, nutrients and organic matter with the sea	Tourism	-115.95	30.4	Zostera marina	0.795935		0.795935	2.92108	Villegas Martínez. K. 2015. Cambios estequiometricos de las hojas del pasto marino Zostera marina en Bahia San Quintin: efectos sobre los mesoherbívoros. Tesis de Maestria. CICESE. Baja California, México. 98 pp.
ID102	Yucatan Peninsula	Quintana Roo	Chetumal	EST110	Bahia de Chetumal	Closed	109800	Mixed semiDiurnal	Undetermined	1249	28	18	The Bacalar-Guerrero system main entrance of fresh water. Due to its physical characteristics, the renewal and circulation of water is slow	Fishing, ecotourism and urban development	-88.0833	18.3333	Halodule wrightii	0.2905	327.053	327.343	1201.35	Olivera-Gómez, L. D., and Mellink, E. (2013). Aquatic Macrophytes Within a Mesohaline Bay, Sanctuary for Manatees (Trichehus manatus), on the Caribbean Coast of Mexico. The Southwestern Naturalist, 58(2), 216-222.
ID103	Yucatan Peninsula	Quintana Roo	Chetumal	EST111	Bahia de Chetumal	Closed	109800	Mixed semiDiurnal	Undetermined	1249	28	18	The Bacalar-Guerrero system main entrance of fresh water. Due to its physical characteristics, the renewal and circulation of water is slow	Fishing, ecotourism and urban development	-88.0833	18.3333	Ruppia maritima	0.1134		0.1134	0.416178	Olivera-Gómez, L. D., and Mellink, E. (2013). Aquatic Macrophytes Within a Mesohaline Bay, Sanctuary for Manatees (Trichehus manatus), on the Caribbean Coast of Mexico. The Southwestern Naturalist, 58(2), 216-222.
ID104	Yucatan Peninsula	Quintana Roo	Mahahual	EST112	Mahahual	Open	undetermined	Mixed semiDiurnal	0.17	1060.6	29.9	36.2	oligotrophic	Ecotourism, tourism, wastewater discharge	-87.7142	18.7038	Thalassia testudinum	1.015	216.312	217.327	797.589	Gutiérrez-Aguirre, M. A., de la Fuente-Betancourt, M. G., and Cervantes-Martínez, A. (2000). Biomasa y densidad de dos especies de pastos marinos en el sur de Quintana Roo, México. Revista de Biología Tropical, 48(2-3), 313-316.
ID105	Yucatan Peninsula	Quintana Roo	Mahahual	EST113	Mahahual	Open	undetermined	Mixed semiDiurnal	0.17	1060.6	29.9	36.2	oligotrophic	Ecotourism, tourism, wastewater discharge	-87.7142	18.7038	Syringodium filiforme	0.14		0.14	0.5138	Gutiérrez-Aguirre, M. A., de la Fuente-Betancourt, M. G., and Cervantes-Martínez, A. (2000). Biomasa y densidad de dos especies de pastos marinos en el sur de Quintana Roo, México. Revista de Biología Tropical, 48(2-3), 313-316.
ID106	Yucatan Peninsula	Quintana Roo	Chetumal	EST114	Boca Bacalar Chico	Closed	undetermined	Mixed semiDiurnal	Undetermined	1249	28	18	The Bacalar-Guerrero system main entrance of fresh water. Due to its physical characteristics, the renewal and circulation of water is slow	Fishing, ecotourism and urban development	-88.3863	18.6712	Thalassia testudinum	0.48125	298.095	298.576	1095.78	Gutiérrez-Aguirre, M. A., de la Fuente-Betancourt, M. G., and Cervantes-Martínez, A. (2000). Biomasa y densidad de dos especies de pastos marinos en el sur de Quintana Roo, México. Revista de Biología Tropical, 48(2-3), 313-316.
ID107	Yucatan Peninsula	Quintana Roo	Puerto Morelos	EST115	Laguna de Puerto Morelos	Closed	9066	Mixed semiDiurnal	Undetermined	1041	27.4	36.3	Undetermined	Ecotourism	-86.825	20.9044	Thalassia testudinum	0.2184		0.2184	0.801528	Pantoja-Reyes, N. 2003. Evaluacion de la importancia de la luz como factor regulador de la productividad foliar del pasto marino T. testudinum en la laguna arrecifal de Puerto Morelos. Tesis de Maestria. Universidad Nacional Autónoma de México. 99 pp.
ID108	Yucatan Peninsula	Quintana Roo	Puerto Morelos	EST116	Laguna de Puerto Morelos	Closed	9066	Mixed semiDiurnal	Undetermined	1041	27.4	36.3	Undetermined	Ecotourism	-86.825	20.9044	Syringodium filiforme	0.06895		0.06895	0.253047	Pantoja-Reyes, N. 2003. Evaluacion de la importancia de la luz como factor regulador de la productividad foliar del pasto marino T. testudinum en la laguna arrecifal de Puerto Morelos. Tesis de Maestria. Universidad Nacional Autónoma de México. 99 pp.
ID109	Yucatan Peninsula	Quintana Roo	Puerto Morelos	EST117	Laguna de Puerto Morelos	Closed	9066	Mixed semiDiurnal	Undetermined	1041	27.4	36.3	Undetermined	Ecotourism	-86.825	20.9044	Thalassia testudinum	1.01255	1.01255	2.0251	7.43212	Duarte, C. M., Merino, M., Agawin, N. S., Uri, J., Fortes, M. D., Gallegos, M. E., and Hemminga, M. A. (1998). Root production and belowground seagrass biomass. Marine Ecology Progress Series, 171, 97-108.
ID110	Yucatan Peninsula	Quintana Roo	Puerto Morelos	EST118	Laguna de Puerto Morelos	Closed	9066	Mixed semiDiurnal	Undetermined	1041	27.4	36.3	Undetermined	Ecotourism	-86.825	20.9044	Halodule wrightii	0.1064	0.1064	0.2128	0.780976	Duarte, C. M., Merino, M., Agawin, N. S., Uri, J., Fortes, M. D., Gallegos, M. E., and Hemminga, M. A. (1998). Root production and belowground seagrass biomass. Marine Ecology Progress Series, 171, 97-108.
ID111	Yucatan Peninsula	Quintana Roo	Puerto Morelos	EST119	Laguna de Puerto Morelos	Closed	9066	Mixed semiDiurnal	Undetermined	1041	27.4	36.3	Undetermined	Ecotourism	-86.825	20.9044	Syringodium filiforme	0.021175	0.021175	0.04235	0.155424	Duarte, C. M., Merino, M., Agawin, N. S., Uri, J., Fortes, M. D., Gallegos, M. E., and Hemminga, M. A. (1998). Root production and belowground seagrass biomass. Marine Ecology Progress Series, 171, 97-108.
ID112	North Pacific	Sinaloa	Laguna Verde	EST12	Laguna Verde	Closed	47	undetermined	Undetermined	630	33	35	Discharge of rivers	Undetermined	-106.417	23.4167	Ruppia maritima	2.17		2.17	7.9639	Flores-Verdugo, F. J., Day, J. W., Mee, L., and Briseño-Dueñas, R. 1988. Phytoplankton production and seasonal biomass variation of seagrass, Ruppia maritima L., in a tropical Mexican lagoon with an ephemeral inlet. Estuaries and Coasts, 11(1), 51-56.
ID113	Yucatan Peninsula	Quintana Roo	Puerto Morelos	EST120	Laguna de Puerto Morelos	Closed	9066	Mixed semiDiurnal	Undetermined	1041	27.4	36.3	Undetermined	Ecotourism	-86.825	20.9044	Thalassia testudinum	0.296217	2.22085	2.51707	9.23765	van Tussenbroek, B. I. (1998). Above-and below-ground biomass and production by Thalassia testudinum in a tropical reef lagoon. Aquatic botany, 61(1), 69-82.
ID114	Yucatan Peninsula	Quintana Roo	Puerto Morelos	EST121	Laguna de Puerto Morelos	Closed	9066	Mixed semiDiurnal	Undetermined	1041	27.4	36.3	Undetermined	Ecotourism	-86.825	20.9044	Thalassia testudinum	0.14455		0.14455	0.530498	van Tussenbroek, B. I. (1995). Thalassia testudinum leaf dynamics in a Mexican Caribbean coral reef lagoon. Marine Biology, 122(1), 33-40.
ID115	Yucatan Peninsula	Quintana Roo	Puerto Morelos	EST122	Laguna de Puerto Morelos	Closed	9066	Mixed semiDiurnal	Undetermined	1041	27.4	36.3	Undetermined	Ecotourism	-86.825	20.9044	Thalassia testudinum	2.3107	0.176312	2.48701	9.12734	Rodríguez-Martínez, R. E., Ruíz-Rentería, F., Tussenbroek, B. V., Barba-Santos, G., Escalante-Mancera, E., Jordán-Garza, G., and Jordán-Dahlgren, E. 2010. Environmental state and tendencies of the Puerto Morelos CARICOMP site, Mexico. Revista de biología tropical, 58, 23-43.
ID116	Yucatan Peninsula	Quintana Roo	Puerto Morelos	EST123	Laguna de Puerto Morelos	Closed	9066	Mixed semiDiurnal	Undetermined	1041	27.4	36.3	Undetermined	Ecotourism	-86.825	20.9044	Syringodium filiforme	0.572688	0.0671125	0.6398	2.34807	Rodríguez-Martínez, R. E., Ruíz-Rentería, F., Tussenbroek, B. V., Barba-Santos, G., Escalante-Mancera, E., Jordán-Garza, G., and Jordán-Dahlgren, E. 2010. Environmental state and tendencies of the Puerto Morelos CARICOMP site, Mexico. Revista de biología tropical, 58, 23-43.
ID117	Yucatan Peninsula	Quintana Roo	Cancun	EST124	Arrecife	Open	undetermined	undetermined	Undetermined	1400	Undetermined	Undetermined	Undetermined	Tourism	-86.7869	21.17	Thalassia testudinum	1.8515	1.8515	3.703	13.59	Gallegos, M. E., Merino, M., Marba, N., and Duarte, C. M. 1993. Biomass and dynamics of Thalassia testudinum in the Mexican Caribbean-elucidating rhizome growth. Marine Ecology Progress Series, 95(1-2), 185-192.
ID118	Yucatan Peninsula	Quintana Roo	Cancun	EST125	Laguna	Closed	undetermined	undetermined	Undetermined	1400	Undetermined	Undetermined	Undetermined	Tourism	-86.7869	21.17	Thalassia testudinum	1.6905	1.6905	3.381	12.4083	Gallegos, M. E., Merino, M., Marba, N., and Duarte, C. M. 1993. Biomass and dynamics of Thalassia testudinum in the Mexican Caribbean-elucidating rhizome growth. Marine Ecology Progress Series, 95(1-2), 185-192.
ID119	Yucatan Peninsula	Quintana Roo	Cancun	EST126	Laguna Bojorquez	Closed	300	undetermined	Undetermined	1400	28.9	30.2	Connected to the Nichupté Lagoon by two artificial canals.	Tourism	-86.7583	21.1266	Thalassia testudinum	4.06	228.7	232.76	854.229	Gallegos, M. E., Merino, M., Marba, N., and Duarte, C. M. 1993. Biomass and dynamics of Thalassia testudinum in the Mexican Caribbean-elucidating rhizome growth. Marine Ecology Progress Series, 95(1-2), 185-192.
ID120	Yucatan Peninsula	Quintana Roo	Puerto Morelos	EST127	Laguna de Puerto Morelos	Closed	9066	Mixed semiDiurnal	Undetermined	1041	27.4	36.3	Undetermined	Ecotourism	-86.825	20.9044	Thalassia testudinum	0.19675	146.952	147.148	540.035	Enríquez, S., Marbà, N., Duarte, C. M., Van Tussenbroek, B. I., and Reyes-Zavala, G. 2001. Effects of seagrass Thalassia testudinum on sediment redox. Marine Ecology Progress Series, 219, 149-158.
ID121	Yucatan Peninsula	Quintana Roo	Puerto Morelos	EST128	Laguna de Puerto Morelos	Closed	9066	Mixed semiDiurnal	Undetermined	1041	27.4	36.3	Undetermined	Ecotourism	-86.825	20.9044	Syringodium filiforme	0.06208	0.350467	0.412547	1.51405	Enríquez, S., Marbà, N., Duarte, C. M., Van Tussenbroek, B. I., and Reyes-Zavala, G. 2001. Effects of seagrass Thalassia testudinum on sediment redox. Marine Ecology Progress Series, 219, 149-158.
ID122	Yucatan Peninsula	Quintana Roo	Puerto Morelos	EST129	Laguna de Puerto Morelos	Closed	9066	Mixed semiDiurnal	Undetermined	1041	27.4	36.3	Undetermined	Ecotourism	-86.825	20.9044	Halodule wrightii	0.00105		0.00105	0.0038535	Enríquez, S., Marbà, N., Duarte, C. M., Van Tussenbroek, B. I., and Reyes-Zavala, G. 2001. Effects of seagrass Thalassia testudinum on sediment redox. Marine Ecology Progress Series, 219, 149-158.
ID123	North Pacific	Baja California	Bahia San Quintin	EST13	Bahia Falsa	Closed	4200	Mixed semiDiurnal	2	296	27	34	Exchange of water, salt, nutrients and organic matter with the sea	Undetermined	-115.95	30.4	Zostera marina	0.2695	0.161	0.4305	1.57993	Poumian-Tapia, M., and Ibarra-Obando, S. E. 1999. Demography and biomass of the seagrass Zostera marina in a Mexican coastal lagoon. Estuaries and Coasts, 22(4), 837-847.
ID124	Yucatan Peninsula	Quintana Roo	Cancun	EST130	Punta Nizuc	Open	2576	Mixed semiDiurnal	Undetermined	1400	30	35	Undetermined	Ecotourism, tourism, wastewater discharge	-86.7858	21.0193	Thalassia testudinum	0.13825		0.13825	0.507377	Nugent, R. S., Jordan, E., and de la Torre, R. 1978. Investigaciónes preliminares de la biomasa de Thalassia testudinum Konig, en la costa del Caribe Méxicano: nota cientifica. An. Centro Cienc. del Mar y Limnol. Univ. Nal. Autón. México, 5(1), 247-254.
ID125	Yucatan Peninsula	Quintana Roo	Cancun	EST131	Punta Nizuc	Open	2576	Mixed semiDiurnal	Undetermined	1400	30	35	Undetermined	Ecotourism, tourism, wastewater discharge	-86.7858	21.0193	Thalassia testudinum	0.21245		0.21245	0.779691	Nugent, R. S., Jordan, E., and de la Torre, R. 1978. Investigaciónes preliminares de la biomasa de Thalassia testudinum Konig, en la costa del Caribe Méxicano: nota cientifica. An. Centro Cienc. del Mar y Limnol. Univ. Nal. Autón. México, 5(1), 247-254.
ID126	Yucatan Peninsula	Quintana Roo	Cancun	EST132	Punta Nizuc	Open	2576	Mixed semiDiurnal	Undetermined	1400	30	35	Undetermined	Ecotourism, tourism, wastewater discharge	-86.7858	21.0193	Thalassia testudinum	0.1316		0.1316	0.482972	Nugent, R. S., Jordan, E., and de la Torre, R. 1978. Investigaciónes preliminares de la biomasa de Thalassia testudinum Konig, en la costa del Caribe Méxicano: nota cientifica. An. Centro Cienc. del Mar y Limnol. Univ. Nal. Autón. México, 5(1), 247-254.
ID127	Yucatan Peninsula	Quintana Roo	Isla Mujeres	EST133	Isla Mujeres	Open	2795	Mixed day y semiDiurnal	Undetermined	1000	29.2	35	Undetermined	Ecotourism, tourism, wastewater discharge	-86.7581	21.2482	Thalassia testudinum	0.1463		0.1463	0.536921	Nugent, R. S., Jordan, E., and de la Torre, R. 1978. Investigaciónes preliminares de la biomasa de Thalassia testudinum Konig, en la costa del Caribe Méxicano: nota cientifica. An. Centro Cienc. del Mar y Limnol. Univ. Nal. Autón. México, 5(1), 247-254.
ID128	Yucatan Peninsula	Quintana Roo	Isla Mujeres	EST134	Isla Mujeres	Open	2795	Mixed day y semiDiurnal	Undetermined	1000	29.2	35	Undetermined	Ecotourism, tourism, wastewater discharge	-86.7581	21.2482	Thalassia testudinum	0.0896		0.0896	0.328832	Nugent, R. S., Jordan, E., and de la Torre, R. 1978. Investigaciónes preliminares de la biomasa de Thalassia testudinum Konig, en la costa del Caribe Méxicano: nota cientifica. An. Centro Cienc. del Mar y Limnol. Univ. Nal. Autón. México, 5(1), 247-254.
ID129	Yucatan Peninsula	Quintana Roo	Isla Mujeres	EST135	Isla Mujeres	Open	2795	Mixed day y semiDiurnal	Undetermined	1000	29.2	35	Undetermined	Ecotourism, tourism, wastewater discharge	-86.7581	21.2482	Thalassia testudinum	0.182		0.182	0.66794	Nugent, R. S., Jordan, E., and de la Torre, R. 1978. Investigaciónes preliminares de la biomasa de Thalassia testudinum Konig, en la costa del Caribe Méxicano: nota cientifica. An. Centro Cienc. del Mar y Limnol. Univ. Nal. Autón. México, 5(1), 247-254.
ID130	Yucatan Peninsula	Quintana Roo	Sian ka'an	EST136	Bahia de la Ascension	Closed	74000	Diurnal	Undetermined	1150	29	34.2	The reef platform that extends beyond the bay constitutes a barrier-type reef. Contribution of a large amount of nutrients from the mangrove area	Ecotourism	-87.5638	19.6807	Thalassia testudinum	7.6678	325.062	332.729	1221.12	Arellano-Méndez, L. U. 2011. Estructura de los pastos marinos y su relación con la variabilidad ambiental a diferentes escalas espaciales. Tesis de Doctorado. Centro de Investigación y de Estudios Avanzados del Instituto Politécnico Nacional (CINVESTAV-IPN), Unidad Mérida, Yucatán, México. 215 pp.
ID131	Yucatan Peninsula	Quintana Roo	Sian ka'an	EST137	Bahia de la Ascension	Closed	74000	Diurnal	Undetermined	1150	29	34.2	The reef platform that extends beyond the bay constitutes a barrier-type reef. Contribution of a large amount of nutrients from the mangrove area	Ecotourism	-87.5638	19.6807	Halodule wrightii	0.1099	0.36855	0.47845	1.75591	Arellano-Méndez, L. U. 2011. Estructura de los pastos marinos y su relación con la variabilidad ambiental a diferentes escalas espaciales. Tesis de Doctorado. Centro de Investigación y de Estudios Avanzados del Instituto Politécnico Nacional (CINVESTAV-IPN), Unidad Mérida, Yucatán, México. 215 pp.
ID132	Yucatan Peninsula	Quintana Roo	Sian ka'an	EST138	Bahia de la Ascension	Closed	74000	Diurnal	Undetermined	1150	29	34.2	The reef platform that extends beyond the bay constitutes a barrier-type reef. Contribution of a large amount of nutrients from the mangrove area	Ecotourism	-87.5638	19.6807	Ruppia maritima	0.09415	0.1442	0.23835	0.874744	Arellano-Méndez, L. U. 2011. Estructura de los pastos marinos y su relación con la variabilidad ambiental a diferentes escalas espaciales. Tesis de Doctorado. Centro de Investigación y de Estudios Avanzados del Instituto Politécnico Nacional (CINVESTAV-IPN), Unidad Mérida, Yucatán, México. 215 pp.
ID133	Yucatan Peninsula	Quintana Roo	Sian ka'an	EST139	Bahia de la Ascension	Closed	74000	Diurnal	Undetermined	1150	29	34.2	The reef platform that extends beyond the bay constitutes a barrier-type reef. Contribution of a large amount of nutrients from the mangrove area	Ecotourism	-87.5638	19.6807	Syringodium filiforme	0.0987	0.48265	0.58135	2.13355	Arellano-Méndez, L. U. 2011. Estructura de los pastos marinos y su relación con la variabilidad ambiental a diferentes escalas espaciales. Tesis de Doctorado. Centro de Investigación y de Estudios Avanzados del Instituto Politécnico Nacional (CINVESTAV-IPN), Unidad Mérida, Yucatán, México. 215 pp.
ID134	North Pacific	Baja California Sur	Sistema Lagunar Bahia Magdalena-Bahia Almejas	EST14	sitios intermareales	Closed	139000	Mixed semiDiurnal	1.5	100	29	34	Contributions of fresh water practically nonexistent. Communication with open sea through a mouth of 5.6 km wide	Fishing and urban development	-111.579	24.3909	Zostera marina	0.4942		0.4942	1.81371	Santamaría-Gallegos, N. A., Félix-Pico, E. F., Sánchez-Lizaso, J. L., and Riosmena-Rodríguez, R. 2007. Ecología de la fanerógama Zostera marina en el sistema lagunar Bahía Magdalena–Bahía Almejas. Estudios ecológicos en Bahía Magdalena. CICIMAR-IPN, La Paz, 101-112.
ID135	Yucatan Peninsula	Quintana Roo	Puerto Morelos	EST140	Laguna de Puerto Morelos	Closed	9066	Mixed semiDiurnal	Undetermined	1041	27.4	36.3	Undetermined	Ecotourism	-86.825	20.9044	Halodule wrightii		2.156	2.156	7.91252	Gallegos Martínez, M., Merino, M., Rodriguez, A., Marbá, N., and Duarte, C. 1994. Growth patterns and demographyof pioneer Caribbean seagrasses Halodule wrightii and Syringodiun filiforme K. Marine Ecology Progress Series, 109, 99-104.
ID136	Yucatan Peninsula	Quintana Roo	Puerto Morelos	EST141	Laguna de Puerto Morelos	Closed	9066	Mixed semiDiurnal	Undetermined	1041	27.4	36.3	Undetermined	Ecotourism	-86.825	20.9044	Syringodium filiforme		2.37965	2.37965	8.73332	Gallegos Martínez, M., Merino, M., Rodriguez, A., Marbá, N., and Duarte, C. 1994. Growth patterns and demographyof pioneer Caribbean seagrasses Halodule wrightii and Syringodiun filiforme K. Marine Ecology Progress Series, 109, 99-104.
ID137	Yucatan Peninsula	Quintana Roo	Isla Mujeres	EST142	Isla Mujeres	Open	2795	Mixed day y semiDiurnal	Undetermined	1000	29.2	35	Undetermined	Ecotourism, tourism, wastewater discharge	-86.7581	21.2482	Thalassia testudinum	1.3692	267.182	268.551	985.584	Herrera-Silveira, J.A., Ramírez Ramírez, J., Medina Gómez, I., Valdez J., Reyes, O., Cámara, J., Caamal, J., y López-Herrera, M. 2008. “Monitoreo 2008 de indicadores de salud del ecosistema de pastos marinos del Parque Nacional Costa Occidental de Isla Mujeres, Punta Cancún y Punta Nizúc”. Informe Final, CINVESTAV-CONANP.
ID138	Yucatan Peninsula	Quintana Roo	Isla Mujeres	EST143	Isla Mujeres	Open	2795	Mixed day y semiDiurnal	Undetermined	1000	29.2	35	Undetermined	Ecotourism, tourism, wastewater discharge	-86.7581	21.2482	Syringodium filiforme	0.69755		0.69755	2.56001	Herrera-Silveira, J.A., Ramírez Ramírez, J., Medina Gómez, I., Valdez J., Reyes, O., Cámara, J., Caamal, J., y López-Herrera, M. 2008. “Monitoreo 2008 de indicadores de salud del ecosistema de pastos marinos del Parque Nacional Costa Occidental de Isla Mujeres, Punta Cancún y Punta Nizúc”. Informe Final, CINVESTAV-CONANP.
ID139	Yucatan Peninsula	Quintana Roo	Cancun	EST144	Punta Cancun	Open	3302	Mixed semiDiurnal	Undetermined	1400	28.5	35	Undetermined	Ecotourism, tourism, wastewater discharge	-86.7469	21.1471	Thalassia testudinum	0.7728	220.573	221.346	812.339	Herrera-Silveira, J.A., Ramírez Ramírez, J., Medina Gómez, I., Valdez J., Reyes, O., Cámara, J., Caamal, J., y López-Herrera, M. 2008. “Monitoreo 2008 de indicadores de salud del ecosistema de pastos marinos del Parque Nacional Costa Occidental de Isla Mujeres, Punta Cancún y Punta Nizúc”. Informe Final, CINVESTAV-CONANP.
ID140	Yucatan Peninsula	Quintana Roo	Cancun	EST145	Punta Cancun	Open	3302	Mixed semiDiurnal	Undetermined	1400	28.5	35	Undetermined	Ecotourism, tourism, wastewater discharge	-86.7469	21.1471	Syringodium filiforme	1.19175		1.19175	4.37372	Herrera-Silveira, J.A., Ramírez Ramírez, J., Medina Gómez, I., Valdez J., Reyes, O., Cámara, J., Caamal, J., y López-Herrera, M. 2008. “Monitoreo 2008 de indicadores de salud del ecosistema de pastos marinos del Parque Nacional Costa Occidental de Isla Mujeres, Punta Cancún y Punta Nizúc”. Informe Final, CINVESTAV-CONANP.
ID141	Yucatan Peninsula	Quintana Roo	Cancun	EST146	Punta Nizuc	Open	2576	Mixed semiDiurnal	Undetermined	1400	30	35	Undetermined	Ecotourism, tourism, wastewater discharge	-86.7858	21.0193	Thalassia testudinum	0.98525	223.376	224.361	823.406	Herrera-Silveira, J.A., Ramírez Ramírez, J., Medina Gómez, I., Valdez J., Reyes, O., Cámara, J., Caamal, J., y López-Herrera, M. 2008. “Monitoreo 2008 de indicadores de salud del ecosistema de pastos marinos del Parque Nacional Costa Occidental de Isla Mujeres, Punta Cancún y Punta Nizúc”. Informe Final, CINVESTAV-CONANP.
ID142	Yucatan Peninsula	Quintana Roo	Cancun	EST147	Punta Nizuc	Open	2576	Mixed semiDiurnal	Undetermined	1400	30	35	Undetermined	Ecotourism, tourism, wastewater discharge	-86.7858	21.0193	Syringodium filiforme	0.43225		0.43225	1.58636	Herrera-Silveira, J.A., Ramírez Ramírez, J., Medina Gómez, I., Valdez J., Reyes, O., Cámara, J., Caamal, J., y López-Herrera, M. 2008. “Monitoreo 2008 de indicadores de salud del ecosistema de pastos marinos del Parque Nacional Costa Occidental de Isla Mujeres, Punta Cancún y Punta Nizúc”. Informe Final, CINVESTAV-CONANP.
ID143	Yucatan Peninsula	Quintana Roo	Mahahual	EST148	Xahuayxol	Closed	undetermined	undetermined	Undetermined	1060.6	29.9	Undetermined	Undetermined	Ecotourism	-87.7589	18.5042	Thalassia testudinum	0.57281		0.57281	2.10221	Ruiz-Zárate, M. A., Espinoza-Avalos, J., Carricart-Ganivet, J. P., and Fragoso, D. 2000. Relationships between Manicina areolata (Cnidaria: Scleractinia), Thalassia testudinum (Anthophyta) and Neogoniolithon sp.(Rhodophyta). Marine Ecology Progress Series, 206, 135-146.
ID144	Yucatan Peninsula	Quintana Roo	Mahahual	EST149	Xahuayxol	Closed	undetermined	undetermined	Undetermined	1060.6	29.9	Undetermined	Undetermined	Ecotourism	-87.7589	18.5042	Syringodium filiforme	0.4984		0.4984	1.82913	Ruiz-Zárate, M. A., Espinoza-Avalos, J., Carricart-Ganivet, J. P., and Fragoso, D. 2000. Relationships between Manicina areolata (Cnidaria: Scleractinia), Thalassia testudinum (Anthophyta) and Neogoniolithon sp.(Rhodophyta). Marine Ecology Progress Series, 206, 135-146.
ID145	North Pacific	Baja California Sur	Sistema Lagunar Bahia Magdalena-Bahia Almejas	EST15	sitios submareales	Closed	139000	Mixed semiDiurnal	1.5	100	29	34	Contributions of fresh water practically nonexistent. Communication with open sea through a mouth of 5.6 km wide	Fishing and urban development	-111.579	24.3909	Zostera marina	0.4851		0.4851	1.78032	Santamaría-Gallegos, N. A., Félix-Pico, E. F., Sánchez-Lizaso, J. L., and Riosmena-Rodríguez, R. 2007. Ecología de la fanerógama Zostera marina en el sistema lagunar Bahía Magdalena–Bahía Almejas. Estudios ecológicos en Bahía Magdalena. CICIMAR-IPN, La Paz, 101-112.
ID146	Yucatan Peninsula	Quintana Roo	Othon P. Blanco	EST150	Banco Chinchorro	Open	70000	undetermined	Undetermined	1450	31	39.6	Undetermined	Ecotourism	-87.3041	18.7442	Thalassia testudinum	0.193235	0.9933	1.18653	4.35458	Datos del Laboratorio de Producción Primaria del CINVESTAV-IPN Unidad Mérida
ID147	Yucatan Peninsula	Quintana Roo	Othon P. Blanco	EST151	Banco Chinchorro	Open	70000	undetermined	Undetermined	1450	31	39.6	Undetermined	Ecotourism	-87.3041	18.7442	Syringodium filiforme	0.18466		0.18466	0.677702	Datos del Laboratorio de Producción Primaria del CINVESTAV-IPN Unidad Mérida
ID148	Yucatan Peninsula	Quintana Roo	Mahahual	EST152	Mahahual	Open	undetermined	Mixed semiDiurnal	0.17	1060.6	29.9	36.2	oligotrophic	Fishing, ecotourism and urban development	-87.7142	18.7038	Thalassia testudinum	0.14602	0.6678	0.81382	2.98672	Datos del Laboratorio de Producción Primaria del CINVESTAV-IPN Unidad Mérida
ID149	Yucatan Peninsula	Quintana Roo	Mahahual	EST153	Mahahual	Open	undetermined	Mixed semiDiurnal	0.17	1060.6	29.9	36.2	oligotrophic	Fishing, ecotourism and urban development	-87.7142	18.7038	Syringodium filiforme	0.81116		0.81116	2.97696	Datos del Laboratorio de Producción Primaria del CINVESTAV-IPN Unidad Mérida
ID150	Yucatan Peninsula	Quintana Roo	Rio Indio	EST154	Rio Indio	Open	undetermined	Mixed semiDiurnal	Undetermined	1060.6	31.5	38.4	Undetermined	Fishing, ecotourism and urban development	-87.6669	18.8078	Thalassia testudinum	0.237405	0.798875	1.03628	3.80315	Datos del Laboratorio de Producción Primaria del CINVESTAV-IPN Unidad Mérida
ID151	Yucatan Peninsula	Quintana Roo	Rio Indio	EST155	Rio Indio	Open	undetermined	Mixed semiDiurnal	Undetermined	1060.6	31.5	38.4	Undetermined	Fishing, ecotourism and urban development	-87.6669	18.8078	Syringodium filiforme	0.809095		0.809095	2.96938	Datos del Laboratorio de Producción Primaria del CINVESTAV-IPN Unidad Mérida
ID152	Yucatan Peninsula	Quintana Roo	Xcalak	EST156	Xcalak	Open	undetermined	Mixed semiDiurnal	Undetermined	1060.6	30	37	Undetermined	Fishing, ecotourism and urban development	-87.8365	18.2452	Thalassia testudinum	0.291795	0.536795	0.82859	3.04093	Datos del Laboratorio de Producción Primaria del CINVESTAV-IPN Unidad Mérida
ID153	Yucatan Peninsula	Quintana Roo	Xcalak	EST157	Xcalak	Open	undetermined	Mixed semiDiurnal	Undetermined	1060.6	30	37	Undetermined	Fishing, ecotourism and urban development	-87.8365	18.2452	Syringodium filiforme	0.635985		0.635985	2.33406	Datos del Laboratorio de Producción Primaria del CINVESTAV-IPN Unidad Mérida
ID154	Yucatan Peninsula	Quintana Roo	Isla Mujeres	EST158	Isla Contoy	Open	undetermined	Mixed day y semiDiurnal	Undetermined	1041	28	36	Undetermined	Ecotourism, tourism, wastewater discharge	-86.7955	21.4812	Thalassia testudinum	1.75003		1.75003	6.42263	Datos del Laboratorio de Producción Primaria del CINVESTAV-IPN Unidad Mérida
ID155	Yucatan Peninsula	Quintana Roo	Laguna Yalahau	EST159	Holbox	Closed	27500	undetermined	Undetermined	1368.3	27.6	35.9	Undetermined	Fishing and ecotourism	-87.2624	21.4651	Thalassia testudinum	0.83825	308.696	309.534	1135.99	Datos del Laboratorio de Producción Primaria del CINVESTAV-IPN Unidad Mérida
ID156	North Pacific	Baja California	Bahia San Quintin	EST16	Bahia San Quintin	Closed	4200	Mixed semiDiurnal	2	296	27	34	Exchange of water, salt, nutrients and organic matter with the sea	Tourism	-115.95	30.4	Zostera marina	0.14		0.14	0.5138	Cabello-Pasini, A., Muñiz-Salazar, R., and Ward, D. H. 2003. Annual variations of biomass and photosynthesis in Zostera marina at its southern end of distribution in the North Pacific. Aquatic botany, 76(1), 31-47.
ID157	North Pacific	Baja California Sur	Laguna Ojo de Liebre	EST17	Laguna Ojo de Liebre	Closed	50000	Mixed semiDiurnal	2	200	Undetermined	Undetermined	Undetermined	Undetermined	-114.083	27.6667	Zostera marina	0.03115		0.03115	0.11432	Cabello-Pasini, A., Muñiz-Salazar, R., and Ward, D. H. 2003. Annual variations of biomass and photosynthesis in Zostera marina at its southern end of distribution in the North Pacific. Aquatic botany, 76(1), 31-47.
ID158	North Pacific	Baja California Sur	Reserva de la Biosfera el Vizcaíno	EST18	Laguna San Ignacio	Closed	23000	Mixed semiDiurnal	2	100	Undetermined	Undetermined	Undetermined	Undetermined	-113.167	26.9167	Zostera marina	0.04795		0.04795	0.175976	Cabello-Pasini, A., Muñiz-Salazar, R., and Ward, D. H. 2003. Annual variations of biomass and photosynthesis in Zostera marina at its southern end of distribution in the North Pacific. Aquatic botany, 76(1), 31-47.
ID159	North Pacific	Baja California Sur	Bahia Concepcion	EST19	Punta Arena	Closed	27500	Mixed	Undetermined	126	32	35.4	Permanent communication with the sea in the far north. It has influence by the current of the Gulf of California.	Undetermined	-111.721	26.5769	Zostera marina	0.308		0.308	1.13036	Santa-Mamá Gallegos , N. 1996. Ciclo de crecimiento y fenologia de la fanerógama Zostera marina L. en Punta Arena, Bahía Concepción, BCS Mexico.Tesis de Maestria. IPN. CICIMAR. Baja California Sur, México. 97 pp.
ID160	North Pacific	Baja California Sur	Bahia Concepcion	EST20	Punta Arena	Closed	27500	Mixed	Undetermined	126	32	35.4	Permanent communication with the sea in the far north. It has influence by the current of the Gulf of California.	Undetermined	-111.721	26.5769	Zostera marina	0.8225		0.8225	3.01857	Santa maria, N., Felix-Pic, E. F., Sánchez-Lizaso, J. L., and Palomares-Garcia, J. R. 1999. Temporal Coindidence of the annual eelgrass Zostera marina and juvenile scallops Argopecten ventricosus (Sowerby 11, 1842) in, Bahia Concepcion, Mexico. Journal of Shellfish Research Vol. 18(2), 415-418.
ID161	North Pacific	Sonora	Sin determinar	EST21	Punta Chueca	Closed	undetermined	SemiDiurnal	Undetermined	175	34	35.8	Undetermined	Undetermined	-112.176	29.1009	Zostera marina	0.777	0.1785	0.9555	3.50669	Meling-López, A. E., and Ibarra-Obando, S. E. 1999. Annual life cycles of two Zostera marina L. populations in the Gulf of California: contrasts in seasonality and reproductive effort. Aquatic Botany, 65(1), 59-69.
ID162	North Pacific	Sonora	Sin determinar	EST22	Punta Viboras	Closed	undetermined	SemiDiurnal	Undetermined	175	34	35.8	Undetermined	Undetermined	-112.238	29.1772	Zostera marina	0.679	0.077	0.756	2.77452	Meling-López, A. E., and Ibarra-Obando, S. E. 1999. Annual life cycles of two Zostera marina L. populations in the Gulf of California: contrasts in seasonality and reproductive effort. Aquatic Botany, 65(1), 59-69.
ID163	North Pacific	Baja California Sur	Bahia Concepcion	EST23	Punta Arena	Closed	27500	Mixed	Undetermined	126	32	35.4	Permanent communication with the sea in the far north. It has influence by the current of the Gulf of California.	Undetermined	-111.721	26.5769	Zostera marina	0.87325	0.091	0.96425	3.5388	Santamarı́a-Gallegos, N. A., Sánchez-Lizaso, J. L., and Félix-Pico, E. F. 2000. Phenology and growth cycle of annual subtidal eelgrass in a subtropical locality. Aquatic Botany, 66(4), 329-339.
ID164	North Pacific	Baja California Sur	Sistema Lagunar Bahia Magdalena-Bahia Almejas	EST24	Sin determinar	Closed	139000	Mixed semiDiurnal	1.5	100	29	34	Contributions of fresh water practically nonexistent. Communication with open sea through a mouth of 5.6 km wide	Fishing and urban development	-111.579	24.3909	Zostera marina		202	202	741.34	Cota Lucero, T. 2017. Secuestro histórico de carbono en sedimentos asociados a praderas de Zostera marina dentro del complejo lagunar Bahía Magdalena-Almejas. Tesis de Maestría. Universidad Autónoma de Baja California Sur. Baja California Sur, Mexico. 69 pp.
ID165	North Pacific	Baja California Sur	Sistema Lagunar Bahia Magdalena-Bahia Almejas	EST25	Sin determinar	Closed	139000	Mixed semiDiurnal	1.5	100	29	34	Contributions of fresh water practically nonexistent. Communication with open sea through a mouth of 5.6 km wide	Fishing and urban development	-111.579	24.3909	Zostera marina	1.2729		1.2729	4.67154	Cota Lucero, T. 2014. Comparación histórica de Zostera marina en el complejo lagunar Bahía Magdalena-Amejas e implicaciones del cambio climático. Tesis de Licenciatura. Universidad Autónoma de Baja California Sur. Baja California Sur, México. 56 pp.
ID166	Gulf of Mexico	Veracruz	Sistema Arrecifal Veracruzano	EST26	Arrecife Hornos	Open	undetermined	Diurnal	Undetermined	1667.6	26.1	34.4	Influence of rivers Jamapa y Papaloapan	Fishing, tourism and urban development	-96.12	19.19	Thalassia testudinum	0.52885	21.0749	21.6037	79.2856	Terrados, J., Ramírez-García, P., Hernández-Martínez, Ó., Pedraza, K., and Quiroz, A. 2008. State of Thalassia testudinum Banks ex König meadows in the Veracruz Reef System, Veracruz, Mexico. Aquatic botany, 88(1), 17-26.
ID167	Gulf of Mexico	Veracruz	Sistema Arrecifal Veracruzano	EST27	Isla Sacrificios	Open	undetermined	Diurnal	Undetermined	1667.6	26.1	34.4	Influence of rivers Jamapa y Papaloapan	Fishing, tourism and urban development	-96.0922	19.1747	Thalassia testudinum	0.5656	19.0577	19.6233	72.0175	Terrados, J., Ramírez-García, P., Hernández-Martínez, Ó., Pedraza, K., and Quiroz, A. 2008. State of Thalassia testudinum Banks ex König meadows in the Veracruz Reef System, Veracruz, Mexico. Aquatic botany, 88(1), 17-26.
ID168	Gulf of Mexico	Veracruz	Sistema Arrecifal Veracruzano	EST28	Isla de En medio	Open	undetermined	Diurnal	Undetermined	1667.6	26.1	34.4	Influence of rivers Jamapa y Papaloapan	Fishing, tourism and urban development	-95.9383	19.105	Thalassia testudinum	0.5726	6.3106	6.8832	25.2613	Terrados, J., Ramírez-García, P., Hernández-Martínez, Ó., Pedraza, K., and Quiroz, A. 2008. State of Thalassia testudinum Banks ex König meadows in the Veracruz Reef System, Veracruz, Mexico. Aquatic botany, 88(1), 17-26.
ID169	Gulf of Mexico	Veracruz	Sistema Arrecifal Veracruzano	EST29	Gallega	Open	undetermined	Diurnal	Undetermined	1667.6	26.1	34.4	Influence of rivers Jamapa y Papaloapan	Fishing, tourism and urban development	-96.131	19.2294	Thalassia testudinum	0.739667	299.145	299.885	1100.58	Datos del Laboratorio de Producción Primaria del CINVESTAV-IPN Unidad Mérida
ID170	Gulf of Mexico	Veracruz	Sistema Arrecifal Veracruzano	EST30	Galleguilla	Open	undetermined	Diurnal	Undetermined	1667.6	26.1	34.4	Influence of rivers Jamapa y Papaloapan	Fishing, tourism and urban development	-96.1264	19.2349	Thalassia testudinum	0.305958	236.025	236.33	867.333	Datos del Laboratorio de Producción Primaria del CINVESTAV-IPN Unidad Mérida
ID171	Gulf of Mexico	Veracruz	Sistema Arrecifal Veracruzano	EST31	Verde	Open	undetermined	Diurnal	Undetermined	1667.6	26.1	34.4	Influence of rivers Jamapa y Papaloapan	Fishing, tourism and urban development	-96.0697	19.1995	Thalassia testudinum	0.707292	275.594	276.301	1014.03	Datos del Laboratorio de Producción Primaria del CINVESTAV-IPN Unidad Mérida
ID172	Gulf of Mexico	Veracruz	Sistema Arrecifal Veracruzano	EST32	Blanca	Open	undetermined	Diurnal	Undetermined	1667.6	26.1	34.4	Influence of rivers Jamapa y Papaloapan	Fishing, tourism and urban development	-95.9946	19.0863	Thalassia testudinum	0.414167	200.299	200.713	736.616	Datos del Laboratorio de Producción Primaria del CINVESTAV-IPN Unidad Mérida
ID173	Gulf of Mexico	Veracruz	Sistema Arrecifal Veracruzano	EST33	Sargazo	Open	undetermined	Diurnal	Undetermined	1667.6	26.1	34.4	Influence of rivers Jamapa y Papaloapan	Fishing, tourism and urban development	-95.9469	19.0983	Thalassia testudinum	0.461708	288.778	289.24	1061.51	Datos del Laboratorio de Producción Primaria del CINVESTAV-IPN Unidad Mérida
ID174	Gulf of Mexico	Veracruz	Sistema Arrecifal Veracruzano	EST34	Cabezo Nte (Valiente)	Open	undetermined	Diurnal	Undetermined	1667.6	26.1	34.4	Influence of rivers Jamapa y Papaloapan	Fishing, tourism and urban development	-95.8633	19.1032	Thalassia testudinum	0.323167	268.561	268.884	986.804	Datos del Laboratorio de Producción Primaria del CINVESTAV-IPN Unidad Mérida
ID175	Gulf of Mexico	Veracruz	Sistema Arrecifal Veracruzano	EST35	Cabezo Sur	Open	undetermined	Diurnal	Undetermined	1667.6	26.1	34.4	Influence of rivers Jamapa y Papaloapan	Fishing, tourism and urban development	-95.83	19.051	Thalassia testudinum	0.559125	267.946	268.505	985.413	Datos del Laboratorio de Producción Primaria del CINVESTAV-IPN Unidad Mérida
ID176	Gulf of Mexico	Veracruz	Sistema Arrecifal Veracruzano	EST36	Isla de En medio	Open	undetermined	Diurnal	Undetermined	1667.6	26.1	34.4	Influence of rivers Jamapa y Papaloapan	Fishing, tourism and urban development	-95.9383	19.105	Thalassia testudinum	0.5726	2.0916	2.6642	9.77761	Ramírez García, P., J. Terrados M., O. Hernández Martínez, K. Pedraza, y A. Quiroz, 2007. La vegetación de Thalassia testudinum en los arrecifes de Hornos, Sacrificios y Enmedio: Biomasa, productividad y dinámica de crecimiento, p. 173-184. In: A. Granados Barba, L. G. Abarca Arenas y J.M. Vargas Hernández (Eds.) Investigaciones Científicas en el Sistema Arrecifal Veracruzano. Universidad Autónom…
ID177	Gulf of Mexico	Veracruz	Sistema Arrecifal Veracruzano	EST37	Isla Sacrificios	Open	undetermined	Diurnal	Undetermined	1667.6	26.1	34.4	Influence of rivers Jamapa y Papaloapan	Fishing, tourism and urban development	-96.0922	19.1747	Thalassia testudinum	0.5656	1.5246	2.0902	7.67103	Ramírez García, P., J. Terrados M., O. Hernández Martínez, K. Pedraza, y A. Quiroz, 2007. La vegetación de Thalassia testudinum en los arrecifes de Hornos, Sacrificios y Enmedio: Biomasa, productividad y dinámica de crecimiento, p. 173-184. In: A. Granados Barba, L. G. Abarca Arenas y J.M. Vargas Hernández (Eds.) Investigaciones Científicas en el Sistema Arrecifal Veracruzano. Universidad Autónom…
ID178	Gulf of Mexico	Veracruz	Sistema Arrecifal Veracruzano	EST38	Arrecife Hornos	Open	undetermined	Diurnal	Undetermined	1667.6	26.1	34.4	Influence of rivers Jamapa y Papaloapan	Fishing, tourism and urban development	-96.12	19.19	Thalassia testudinum	0.52885	1.0913	1.62015	5.94595	Ramírez García, P., J. Terrados M., O. Hernández Martínez, K. Pedraza, y A. Quiroz, 2007. La vegetación de Thalassia testudinum en los arrecifes de Hornos, Sacrificios y Enmedio: Biomasa, productividad y dinámica de crecimiento, p. 173-184. In: A. Granados Barba, L. G. Abarca Arenas y J.M. Vargas Hernández (Eds.) Investigaciones Científicas en el Sistema Arrecifal Veracruzano. Universidad Autónom…
ID179	Gulf of Mexico	Veracruz	Sistema Arrecifal Veracruzano	EST39	Isla Sacrificios	Open	undetermined	Diurnal	Undetermined	1667.6	26.1	34.4	Influence of rivers Jamapa y Papaloapan	Fishing, tourism and urban development	-96.0922	19.1747	Thalassia testudinum	6.748		6.748	24.7652	Ibarra Morales, N., y Abarca Arenas, L.G. 2007. Distribución, abundancia y biomasa de Thalassia testudinum en la laguna del arrecife Sacrificios, Veracruz, p. 161-172. In: Granados Barba, A., Abarca Arenas, L.G. y Vargas Hernández, J.M. (Eds.) Investigaciones Científicas en el Sistema Arrecifal Veracruzano. Universidad Autónoma de Campeche. ISBN 968-5722-53-6. 304 p.
ID180	Gulf of Mexico	Veracruz	Sistema Arrecifal Veracruzano	EST40	Isla Sacrificios	Open	undetermined	Diurnal	Undetermined	1667.6	26.1	34.4	Influence of rivers Jamapa y Papaloapan	Fishing, tourism and urban development	-96.0922	19.1747	Thalassia testudinum	3.46559		3.46559	12.7187	Ibarra Morales, N., y Abarca Arenas, L.G. 2007. Distribución, abundancia y biomasa de Thalassia testudinum en la laguna del arrecife Sacrificios, Veracruz, p. 161-172. In: Granados Barba, A., Abarca Arenas, L.G. y Vargas Hernández, J.M. (Eds.) Investigaciones Científicas en el Sistema Arrecifal Veracruzano. Universidad Autónoma de Campeche. ISBN 968-5722-53-6. 304 p.
ID181	Gulf of Mexico	Veracruz	Sistema Arrecifal Veracruzano	EST41	Arrecife Pajaros	Open	undetermined	Diurnal	Undetermined	1667.6	26.1	34.4	Influence of rivers Jamapa y Papaloapan	Fishing, tourism and urban development	-96.0953	19.1806	Thalassia testudinum	1.2131	0.39165	1.60475	5.88943	Lot Helgueras, A., 1971. Estudios sobre fanerógamas marinas en las cercanías de Veracruz, Ver. An. Inst.Biol. UNAM Ser. Bot., 42:1-48.
ID182	Gulf of Mexico	Veracruz	Sistema Arrecifal Veracruzano	EST42	Arrecife Pajaros	Open	undetermined	Diurnal	Undetermined	1667.6	26.1	34.4	Influence of rivers Jamapa y Papaloapan	Fishing, tourism and urban development	-96.0786	19.1806	Syringodium filiforme	0.2674	0.17325	0.44065	1.61719	Lot Helgueras, A., 1971. Estudios sobre fanerógamas marinas en las cercanías de Veracruz, Ver. An. Inst.Biol. UNAM Ser. Bot., 42:1-48.
ID183	Gulf of Mexico	Veracruz	Sistema Arrecifal Veracruzano	EST43	Arrecife Hornos	Open	undetermined	Diurnal	Undetermined	1667.6	26.1	34.4	Influence of rivers Jamapa y Papaloapan	Fishing, tourism and urban development	-96.12	19.19	Halodule wrightii	0.04515	0.0301	0.07525	0.276167	Lot Helgueras, A., 1971. Estudios sobre fanerógamas marinas en las cercanías de Veracruz, Ver. An. Inst.Biol. UNAM Ser. Bot., 42:1-48.
ID184	Gulf of Mexico	Veracruz	Sistema Arrecifal Veracruzano	EST44	Isla Verde	Open	undetermined	Diurnal	Undetermined	1667.6	26.1	34.4	Influence of rivers Jamapa y Papaloapan	Fishing, tourism and urban development	-96.0697	19.1995	Thalassia testudinum	1.25825	1.66145	2.9197	10.7153	Lot Helgueras, A., 1971. Estudios sobre fanerógamas marinas en las cercanías de Veracruz, Ver. An. Inst.Biol. UNAM Ser. Bot., 42:1-48.
ID185	Gulf of Mexico	Veracruz	Actopan	EST45	Laguna La Mancha	Closed	140	Mixed day	0.8	1350	27	23.8	Rill Pasos El Limón. Sandy barrier that closes during the nortes. During the rainy season there are fresh water discharges through streams, and a permanent contribution from the Caño River	Urban Development	-96.3833	19.5667	Ruppia maritima	0.056		0.056	0.20552	Rivera-Guzmán, N. E., Moreno-Casasola, P., Ibarra-Obando, S. E., Sosa, V. J., and Herrera-Silveira, J. 2014. Long term state of coastal lagoons in Veracruz, Mexico: Effects of land use changes in watersheds on seagrasses habitats. Ocean & Coastal Management, 87, 30-39.
ID186	Gulf of Mexico	Veracruz	Actopan	EST46	Laguna La Mancha	Closed	140	Mixed day	0.8	1350	27	23.8	Rill Pasos El Limón. Sandy barrier that closes during the nortes. During the rainy season there are fresh water discharges through streams, and a permanent contribution from the Caño River	Urban Development	-96.3833	19.5667	Halodule wrightii	0.21		0.21	0.7707	Rivera-Guzmán, N. E., Moreno-Casasola, P., Ibarra-Obando, S. E., Sosa, V. J., and Herrera-Silveira, J. 2014. Long term state of coastal lagoons in Veracruz, Mexico: Effects of land use changes in watersheds on seagrasses habitats. Ocean & Coastal Management, 87, 30-39.
ID187	Gulf of Mexico	Veracruz	Tuxpan	EST47	Laguna Tampamachoco	Closed	1500	undetermined	Undetermined	1500	26.8	31.4	River Tuxpan	Fishing, tourism and urban development	-97.3333	20.9667	Halodule wrightii	0.0735	198.75	198.823	729.682	Rivera-Guzmán, N. E., Moreno-Casasola, P., Ibarra-Obando, S. E., Sosa, V. J., and Herrera-Silveira, J. 2014. Long term state of coastal lagoons in Veracruz, Mexico: Effects of land use changes in watersheds on seagrasses habitats. Ocean & Coastal Management, 87, 30-39.
ID188	Gulf of Mexico	Veracruz	Tuxpan	EST48	Laguna Tampamachoco	Closed	1500	undetermined	Undetermined	1500	26.8	31.4	River Tuxpan	Fishing, tourism and urban development	-97.3333	20.9667	Halodule wrightii	0.084		0.084	0.30828	Rivera-Guzmán, N. E., Moreno-Casasola, P., Ibarra-Obando, S. E., Sosa, V. J., and Herrera-Silveira, J. 2014. Long term state of coastal lagoons in Veracruz, Mexico: Effects of land use changes in watersheds on seagrasses habitats. Ocean & Coastal Management, 87, 30-39.
ID189	Gulf of Mexico	Veracruz	Nautla	EST49	Estero Casitas	Closed	200	undetermined	Undetermined	1300	28	34	River Bobos	Fishing, tourism and urban development	-96.7953	20.2492	Ruppia maritima	0.2625		0.2625	0.963375	Rivera-Guzmán, N. E., Moreno-Casasola, P., Ibarra-Obando, S. E., Sosa, V. J., and Herrera-Silveira, J. 2014. Long term state of coastal lagoons in Veracruz, Mexico: Effects of land use changes in watersheds on seagrasses habitats. Ocean & Coastal Management, 87, 30-39.
ID190	Gulf of Mexico	Veracruz	Nautla	EST50	Estero Casitas	Closed	200	undetermined	Undetermined	1300	28	34	River Bobos	Undetermined	-96.7953	20.2492	Ruppia maritima	0.0875		0.0875	0.321125	Rivera-Guzmán, N. E., Moreno-Casasola, P., Ibarra-Obando, S. E., Sosa, V. J., and Herrera-Silveira, J. 2014. Long term state of coastal lagoons in Veracruz, Mexico: Effects of land use changes in watersheds on seagrasses habitats. Ocean & Coastal Management, 87, 30-39.
ID191	Gulf of Mexico	Veracruz	Vega de Alatorre	EST51	Laguna Grande y Chica	Closed	2250	undetermined	Undetermined	1350	29.1	11.3	Rio Colipa. Se comunica con el Golfo de Mexico por medio de un canal que se une con la desembocadura del rio.	Undetermined	-96.6333	20.05	Ruppia maritima	0.1225		0.1225	0.449575	Rivera-Guzmán, N. E., Moreno-Casasola, P., Ibarra-Obando, S. E., Sosa, V. J., and Herrera-Silveira, J. 2014. Long term state of coastal lagoons in Veracruz, Mexico: Effects of land use changes in watersheds on seagrasses habitats. Ocean & Coastal Management, 87, 30-39.
ID192	Gulf of Mexico	Veracruz	Alvarado	EST52	Laguna Alvarado	Closed	11800	Diurnal	Undetermined	1750	33	21.4	It consists of 4 lagoons, an artificial channel, the entrance of Alvarado and 4 rivers.	Tourism and urban development	-95.7333	18.7167	Ruppia maritima	1.253	148.96	150.213	551.282	Rivera-Guzmán, N. E., Moreno-Casasola, P., Ibarra-Obando, S. E., Sosa, V. J., and Herrera-Silveira, J. 2014. Long term state of coastal lagoons in Veracruz, Mexico: Effects of land use changes in watersheds on seagrasses habitats. Ocean & Coastal Management, 87, 30-39.
ID193	Gulf of Mexico	Veracruz	Actopan	EST53	Laguna La Mancha	Closed	140	Mixed day	0.8	1350	27	23.8	Rill Pasos El Limón. Sandy barrier that closes during the nortes. During the rainy season there are fresh water discharges through streams, and a permanent contribution from the Caño River	Urban Development	-96.3833	19.5667	Halodule beaudettei	0.13349		0.13349	0.489908	Barreiro-Güemes, T., y Balderas-Cortés, J. 1991. Evaluación de algunas comunidades de productores primarios de la Laguna de la Mancha, Veracruz. In Anales del Instituto de Ciencias del Mar y Limnología. Vol. 18(2) ,229-245.
ID194	Gulf of Mexico	Veracruz	Actopan	EST54	Laguna La Mancha	Closed	140	Mixed day	0.8	1350	27	23.8	Rill Pasos El Limón. Sandy barrier that closes during the nortes. During the rainy season there are fresh water discharges through streams, and a permanent contribution from the Caño River	Urban Development	-96.3833	19.5667	Ruppia maritima	0.002905		0.002905	0.0106613	Rivera-Guzmán, N. E. 2008. Variación espacial y temporal de los parámetros fisicoquímicos, biológicos y de la distribución de los pastos marinos en la laguna de La Mancha. Tesis de Maestría.Instituto de Ecología, AC. Veracruz, México. 90 pp.
ID195	Gulf of Mexico	Veracruz	Actopan	EST55	Laguna La Mancha	Closed	140	Mixed day	0.8	1350	27	23.8	Rill Pasos El Limón. Sandy barrier that closes during the nortes. During the rainy season there are fresh water discharges through streams, and a permanent contribution from the Caño River	Urban Development	-96.3833	19.5667	Halodule wrightii	0.002905		0.002905	0.0106613	Rivera-Guzmán, N. E. 2008. Variación espacial y temporal de los parámetros fisicoquímicos, biológicos y de la distribución de los pastos marinos en la laguna de La Mancha. Tesis de Maestría.Instituto de Ecología, AC. Veracruz, México. 90 pp.
ID196	Gulf of Mexico	Veracruz	Alvarado	EST56	Laguna Alvarado	Closed	11800	Diurnal	Undetermined	1750	33	21.4	It consists of 4 lagoons, an artificial channel, the entrance of Alvarado and 4 rivers.	Urban Development	-95.7333	18.7167	Ruppia maritima	3.78735		3.78735	13.8996	Raz-Guzmán, A., and Barba, E. 2000. Seagrass biomass, distribution and associated macrofauna in southwestern Gulf of Mexico coastal lagoons. Biol. Mar. Medit, 7(2), 271-274.
ID197	Gulf of Mexico	Veracruz	Tamiahua	EST57	Laguna Tamiahua	Closed	140500	Diurnal	Undetermined	Undetermined	31.4	37	Main rivers La Laja, Cucharas and Tanconchín	Fishing, tourism, urban development, wastewater discharge	-97.3333	20.9667	Halodule wrightii	0.18025	165	165.18	606.212	Raz-Guzmán, A., and Barba, E. 2000. Seagrass biomass, distribution and associated macrofauna in southwestern Gulf of Mexico coastal lagoons. Biol. Mar. Medit, 7(2), 271-274.
ID198	Gulf of Mexico	Tamaulipas	Tamaulipas	EST58	Laguna Madre	Closed	200000	Diurnal	1.37	1500	23	35	Reduced communication with the sea and minimal currents by rivers, marine communication restricted by 5 entries.	Discharge of wastewater	-97.6081	25.2322	Halodule wrightii	0.18935		0.18935	0.694914	Raz-Guzmán, A., and Barba, E. 2000. Seagrass biomass, distribution and associated macrofauna in southwestern Gulf of Mexico coastal lagoons. Biol. Mar. Medit, 7(2), 271-274.
ID199	Gulf of Mexico	Veracruz	Sistema Arrecifal Veracruzano	EST59	Isla de En medio	Open	undetermined	Diurnal	Undetermined	1667.6	26.1	34.4	Influence of rivers Jamapa y Papaloapan	Fishing, tourism and urban development	-95.9383	19.105	Thalassia testudinum	1.31532	1.03021	2.34554	8.60812	Camalich, J.M. 2001. Comparación de la Producción de Thalassia testudinum en Veracruz, Campeche y Yucatán. Tesis de Licenciatura. Universidad Autónoma Metropolitana de Iztapalapa, División Ciencias Biológicas de la Salud. 26 pp.
ID200	Gulf of Mexico	Veracruz	Sistema Arrecifal Veracruzano	EST60	Isla Verde	Open	undetermined	Diurnal	Undetermined	1667.6	26.1	34.4	Influence of rivers Jamapa y Papaloapan	Fishing, tourism and urban development	-96.0697	19.1995	Thalassia testudinum	0.991546	1.20787	2.19941	8.07185	Camalich, J.M. 2001. Comparación de la Producción de Thalassia testudinum en Veracruz, Campeche y Yucatán. Tesis de Licenciatura. Universidad Autónoma Metropolitana de Iztapalapa, División Ciencias Biológicas de la Salud. 26 pp.
ID201	Gulf of Mexico	Veracruz	Tuxpan	EST61	Laguna Tampamachoco	Closed	1500	undetermined	Undetermined	1500	26.8	31.4	River Tuxpan	Fishing, urban development, industrial	-97.3333	20.9667	Halodule wrightii	0.5789		0.5789	2.12456	Sotelo Giner, F. 2014. Distribución y biomasa del pasto marino Halodule wrightii en la laguna de Tampamachoco, Tuxpan Veracruz. Tesis de Maestría. Universidad Veracruzana. Facultad de Ciencias Biológicas y Agropecuarias. Veracruz, México. 54 pp.
ID202	Gulf of Mexico	Veracruz	Alvarado	EST62	Laguna Alvarado	Closed	11800	Diurnal	Undetermined	1750	33	21.4	It consists of 4 lagoons, an artificial channel, the entrance of Alvarado and 4 rivers.	Fishing, tourism, urban development, wastewater discharge	-95.7333	18.7167	Ruppia maritima	0.8225		0.8225	3.01857	Winfield, I., Cházaro-Olvera, S.,y Álvarez, F. 2007. ¿ Controla la biomasa de pastos marinos la densidad de los peracáridos (Crustacea: Peracarida) en lagunas tropicales?. Revista de biología tropical, 55(1), 43-51.
ID203	Yucatan Peninsula	Campeche	Ciudad del Carmen	EST63	Laguna de Terminos	Closed	250000	Mixed day	0.4	1378	33	35	Two entrances with permanent connection to Campeche and three rivers.	Urban Development	-91.52	18.6219	Thalassia testudinum		96.25	96.25	353.238	Calva-Benítez, L. G., y Torres-Alvarado, R. 2011. Carbono orgánico y características texturales de sedimentos en áreas del pasto marino Thalassia testudinum en ecosistemas costeros del sureste del golfo de México. Universidad y ciencia, 27(2), 133-144.
ID204	Yucatan Peninsula	Campeche	Ciudad del Carmen	EST64	Laguna de Terminos	Closed	250000	Mixed day	0.4	1378	33	35	Two entrances with permanent connection to Campeche and three rivers.	Fishing, tourism and urban development	-91.52	18.6219	Thalassia testudinum	0.41265		0.41265	1.51443	Raz-Guzmán, A., and Barba, E. 2000. Seagrass biomass, distribution and associated macrofauna in southwestern Gulf of Mexico coastal lagoons. Biol. Mar. Medit, 7(2), 271-274.
ID205	Yucatan Peninsula	Campeche	Ciudad del Carmen	EST65	Laguna de Terminos	Closed	250000	Mixed day	0.4	1378	33	35	Two entrances with permanent connection to Campeche and three rivers.	Fishing, tourism and urban development	-91.52	18.6219	Halodule wrightii	0.0427		0.0427	0.156709	Raz-Guzmán, A., and Barba, E. 2000. Seagrass biomass, distribution and associated macrofauna in southwestern Gulf of Mexico coastal lagoons. Biol. Mar. Medit, 7(2), 271-274.
ID206	Yucatan Peninsula	Campeche	Ciudad del Carmen	EST66	Laguna de Terminos	Closed	250000	Mixed day	0.4	1378	33	35	Two entrances with permanent connection to Campeche and three rivers.	Fishing, tourism and urban development	-91.52	18.6219	Syringodium filiforme	0.04795		0.04795	0.175976	Raz-Guzmán, A., and Barba, E. 2000. Seagrass biomass, distribution and associated macrofauna in southwestern Gulf of Mexico coastal lagoons. Biol. Mar. Medit, 7(2), 271-274.
ID207	Yucatan Peninsula	Campeche	Tenabo	EST67	Tenabo	Closed	undetermined	undetermined	Undetermined	1600	24.2	35.2	Very strong estuarine influence, silty sediments between 10 and 60% carbonates. High content of organic matter (> 10%)	Undetermined	-90.7252	19.4009	Thalassia testudinum	1.61859	1.40858	3.02717	11.1097	Camalich, J.M. 2001. Comparación de la Producción de Thalassia testudinum en Veracruz, Campeche y Yucatán. Tesis de Licenciatura. Universidad Autónoma Metropolitana de Iztapalapa, División Ciencias Biológicas de la Salud. México. 26 pp.
ID208	Yucatan Peninsula	Campeche	Calkini	EST68	Isla Arena	Closed	undetermined	undetermined	Undetermined	1097	26.4	36.2	Typical marine area that has sand containing 70 to 90% carbonates with MO <10%.	Undetermined	-90.4672	20.6987	Thalassia testudinum	1.36498	1.15855	2.52352	9.26133	Camalich, J.M. 2001. Comparación de la Producción de Thalassia testudinum en Veracruz, Campeche y Yucatán. Tesis de Licenciatura. Universidad Autónoma Metropolitana de Iztapalapa, División Ciencias Biológicas de la Salud. México. 26 pp.
ID209	Yucatan Peninsula	Campeche	Ciudad del Carmen	EST69	Laguna de Terminos	Closed	250000	Mixed day	0.4	1378	33	35	Two entrances with permanent connection to Campeche and three rivers.	Fishing, tourism and urban development	-91.52	18.6219	Thalassia testudinum	0.9275	304.55	305.477	1121.1	Herrera-Silveira, J.A. Arellano-Mendez, L., and Morales-Ojeda, S. 2011. Report of the Pilot Project Natural Habitat and Ecosystem Conservation of Coastal and Marine Zones of the Gulf of Mexico: Seagrass beds characterization for restoration pilot project: Phase I-2011. Integrated Assessment and Management of the Gulf of Mexico large marine ecosystem project. 37 pp.
ID210	Yucatan Peninsula	Campeche	Ciudad del Carmen	EST70	Laguna de Terminos	Closed	250000	Mixed day	0.4	1378	33	35	Two entrances with permanent connection to Campeche and three rivers.	Fishing, tourism and urban development	-91.52	18.6219	Thalassia testudinum	0.7525		0.7525	2.76167	Yáñez-Arancibia, A., and Day Jr, J. W. 1982. Ecological characterization of Terminos Lagoon, a tropical lagoon-estuarine system in the southern Gulf of Mexico. Oceanol. Acta, 5(4), 431-440.
ID211	Yucatan Peninsula	Campeche	Ciudad del Carmen	EST71	Laguna de Terminos	Closed	250000	Mixed day	0.4	1378	33	35	Two entrances with permanent connection to Campeche and three rivers.	Fishing, tourism and urban development	-91.52	18.6219	Thalassia testudinum	1.337		1.337	4.90679	Hornelas, Y. D. J. 1975. Comparación de la biomasa, densidad y de algunos aspectos morfométricos de la fanerogama marina Thalassia testudinum, König, 1805, en tres diferentes areas geográficas del Golfo de México. Tesis de Licenciatura. México, D.F. 54 pp.
ID212	Yucatan Peninsula	Campeche	Ciudad del Carmen	EST72	Laguna de Terminos	Closed	250000	Mixed day	0.4	1378	33	35	Two entrances with permanent connection to Campeche and three rivers.	Fishing, tourism and urban development	-91.52	18.6219	Thalassia testudinum	4.256		4.256	15.6195	Moore, K. A., and Wetzel, R. L. 1988. The distribution and productivity of seagrasses in the Terminos lagoon. Ecology of Coastal Ecosystems in the southern Gulf of México-The Términos lagoon region, Universidad Nacional Autónoma de México, México, 207-220.
ID213	Yucatan Peninsula	Campeche	Ciudad del Carmen	EST73	Laguna de Terminos	Closed	250000	Mixed day	0.4	1378	33	35	Two entrances with permanent connection to Campeche and three rivers.	Fishing, tourism and urban development	-91.52	18.6219	Thalassia testudinum	1.07866		1.07866	3.9587	Consultores en Gestión, Política y Planificación Ambiental, S.C. 2014. Proyecto Libramiento Sur Ciudad del Carmen (PLS-C). 21 pp.
ID214	Yucatan Peninsula	Campeche	Ciudad del Carmen	EST74	Laguna de Terminos	Closed	250000	Mixed day	0.4	1378	33	35	Two entrances with permanent connection to Campeche and three rivers.	Fishing, tourism and urban development	-91.52	18.6219	Halodule wrightii	0.125475		0.125475	0.460493	Consultores en Gestión, Política y Planificación Ambiental, S.C. 2014. Proyecto Libramiento Sur Ciudad del Carmen (PLS-C). 21 pp.
ID215	Yucatan Peninsula	Campeche	Ciudad del Carmen	EST75	Laguna de Terminos	Closed	250000	Mixed day	0.4	1378	33	35	Two entrances with permanent connection to Campeche and three rivers.	Fishing, tourism and urban development	-91.52	18.6219	Syringodium filiforme	0.155575		0.155575	0.57096	Consultores en Gestión, Política y Planificación Ambiental, S.C. 2014. Proyecto Libramiento Sur Ciudad del Carmen (PLS-C). 21 pp.
ID216	Yucatan Peninsula	Campeche	Campeche	EST76	Bahía de Campeche	Open	160000	Mixed semiDiurnal	Undetermined	1600	33	26	In the western portion by the Grijalva-Usumacinta and Laguna de Términos systems. That of the river champoton in the eastern part.	Discharge of wastewater	-90.5417	19.9218	Thalassia testudinum	0.43512	331.98	332.415	1219.96	Lopez-Herrera, M. 2011. Caracterización de las variables morfometricas y estructurales de Thalassia testudinum y su relación con la hidroquímica y sedimentos en la Bahía de Campeche frente a la ciudad de Campeche. Tesis de Licenciatura. Universidad Autónoma de Yucatán. Yucatán, México. 57 pp.
ID217	Yucatan Peninsula	Yucatan	Dzilam de Bravo	EST77	Laguna de Dzilam	Closed	940	Diurnal	1.2	601.8	31	26.5	Exchange with marine zone and underground water discharges. Low intensity waves.	Fishing and ecotourism	-88.6457	21.474	Halodule wrightii	0.119	0.188125	0.307125	1.12715	Medina-Gómez, I., and Herrera-Silveira, J. A. 2006. Primary production dynamics in a pristine groundwater influenced coastal lagoon of the Yucatan Peninsula. Continental Shelf Research, 26(8), 971-986.
ID218	Yucatan Peninsula	Yucatan	Rio Lagartos	EST78	Laguna Rio Lagartos	Closed	9600	Diurnal	1.98	683.9	27.3	29.7	Communication with the Gulf of Mexico through Dos Bocas.	Fishing and ecotourism	-88.1656	21.5977	Thalassia testudinum	1.30697	204.715	206.022	756.1	Camalich, J.M. 2001. Comparación de la Producción de Thalassia testudinum en Veracruz, Campeche y Yucatán. Tesis de Licenciatura. Universidad Autónoma Metropolitana de Iztapalapa, División Ciencias Biológicas de la Salud. México. 26 pp.
ID219	Yucatan Peninsula	Yucatan	Dzilam de Bravo	EST79	Laguna de Dzilam	Closed	940	Diurnal	1.2	601.8	31	26.5	Exchange with marine zone and underground water discharges. Low intensity waves.	Fishing and ecotourism	-88.6457	21.474	Thalassia testudinum	2.79137	4.50789	7.29926	26.7883	Camalich, J.M. 2001. Comparación de la Producción de Thalassia testudinum en Veracruz, Campeche y Yucatán. Tesis de Licenciatura. Universidad Autónoma Metropolitana de Iztapalapa, División Ciencias Biológicas de la Salud. México. 26 pp.
ID220	Yucatan Peninsula	Yucatan	Celestun	EST80	Laguna de Celestun	Closed	2800	Mixed semiDiurnal	1.1	760	31.4	38.2	It communicates with the sea through an entrance of 410 m.	Fishing and ecotourism	-90.3878	20.8217	Halodule wrightii	1.30375		1.30375	4.78476	Herrera-Silveira, J. A. 1994. Phytoplankton productivity and submerged macrophyte biomass variation in a tropical coastal lagoon with ground water discharge. Vie Milieu, 44(3/4), 257-266.
ID221	Yucatan Peninsula	Yucatan	Celestun	EST81	Costa	Open	undetermined	Mixed semiDiurnal	1.1	760	29.6	36.6	Undetermined	Fishing and ecotourism	-90.4157	20.8628	Halodule wrightii	0.00315	194.505	194.508	713.844	Aguayo, C. M. 2004. Estructura de la vegetación acuática sumergida como bioindicador de la calidad del agua en una zona costera tropical. Tesis de Maestría. Centro de Investigación y de Estudios Avanzados del Instituto Politécnico Nacional (CINVESTAV-IPN), Unidad Mérida.Yucatán, México. 113 pp.
ID222	Yucatan Peninsula	Yucatan	Celestun	EST82	Costa	Open	undetermined	Mixed semiDiurnal	1.1	760	29.6	36.6	Undetermined	Fishing and ecotourism	-90.4157	20.8628	Syringodium filiforme	7e-05		7e-05	0.0002569	Aguayo, C. M. 2004. Estructura de la vegetación acuática sumergida como bioindicador de la calidad del agua en una zona costera tropical. Tesis de Maestría. Centro de Investigación y de Estudios Avanzados del Instituto Politécnico Nacional (CINVESTAV-IPN), Unidad Mérida.Yucatán, México. 113 pp.
ID223	Yucatan Peninsula	Yucatan	Celestun	EST83	Costa	Open	undetermined	Mixed semiDiurnal	1.1	760	29.6	36.6	Undetermined	Fishing and ecotourism	-90.4157	20.8628	Thalassia testudinum	0.01218		0.01218	0.0447006	Aguayo, C. M. 2004. Estructura de la vegetación acuática sumergida como bioindicador de la calidad del agua en una zona costera tropical. Tesis de Maestría. Centro de Investigación y de Estudios Avanzados del Instituto Politécnico Nacional (CINVESTAV-IPN), Unidad Mérida.Yucatán, México. 113 pp.
ID224	Yucatan Peninsula	Yucatan	Progreso	EST84	Costa	Open	undetermined	Mixed semiDiurnal	Undetermined	444	27.1	36	Undetermined	Fishing, tourism and urban development	-89.6638	21.294	Thalassia testudinum	0.0010675		0.0010675	0.00391772	Aguayo, C. M. 2004. Estructura de la vegetación acuática sumergida como bioindicador de la calidad del agua en una zona costera tropical. Tesis de Maestría. Centro de Investigación y de Estudios Avanzados del Instituto Politécnico Nacional (CINVESTAV-IPN), Unidad Mérida.Yucatán, México. 113 pp.
ID225	Yucatan Peninsula	Yucatan	Progreso	EST85	Costa	Open	undetermined	Mixed semiDiurnal	Undetermined	444	27.1	36	Undetermined	Fishing, tourism and urban development	-89.6638	21.294	Halodule wrightii	0.004865		0.004865	0.0178545	Aguayo, C. M. 2004. Estructura de la vegetación acuática sumergida como bioindicador de la calidad del agua en una zona costera tropical. Tesis de Maestría. Centro de Investigación y de Estudios Avanzados del Instituto Politécnico Nacional (CINVESTAV-IPN), Unidad Mérida.Yucatán, México. 113 pp.
ID226	Yucatan Peninsula	Yucatan	Progreso	EST86	Costa	Open	undetermined	Mixed semiDiurnal	Undetermined	444	27.1	36	Undetermined	Fishing, tourism and urban development	-89.6638	21.294	Syringodium filiforme	0.00063175		0.00063175	0.00231852	Aguayo, C. M. 2004. Estructura de la vegetación acuática sumergida como bioindicador de la calidad del agua en una zona costera tropical. Tesis de Maestría. Centro de Investigación y de Estudios Avanzados del Instituto Politécnico Nacional (CINVESTAV-IPN), Unidad Mérida.Yucatán, México. 113 pp.
ID227	Yucatan Peninsula	Yucatan	Dzilam de Bravo	EST87	Costa	Open	undetermined	Diurnal	1.2	601.8	29.8	36.3	Exchange with marine zone and underground water discharges. Low intensity waves.	Fishing and ecotourism	-88.8924	21.4067	Thalassia testudinum	0.0177783		0.0177783	0.0652462	Aguayo, C. M. 2004. Estructura de la vegetación acuática sumergida como bioindicador de la calidad del agua en una zona costera tropical. Tesis de Maestría. Centro de Investigación y de Estudios Avanzados del Instituto Politécnico Nacional (CINVESTAV-IPN), Unidad Mérida.Yucatán, México. 113 pp.
ID228	Yucatan Peninsula	Yucatan	Dzilam de Bravo	EST88	Costa	Open	undetermined	Diurnal	1.2	601.8	29.8	36.3	Exchange with marine zone and underground water discharges. Low intensity waves.	Fishing and ecotourism	-88.8924	21.4067	Halodule wrightii	0.00170275		0.00170275	0.00624909	Aguayo, C. M. 2004. Estructura de la vegetación acuática sumergida como bioindicador de la calidad del agua en una zona costera tropical. Tesis de Maestría. Centro de Investigación y de Estudios Avanzados del Instituto Politécnico Nacional (CINVESTAV-IPN), Unidad Mérida.Yucatán, México. 113 pp.
ID229	Yucatan Peninsula	Yucatan	Dzilam de Bravo	EST89	Costa	Open	undetermined	Diurnal	1.2	601.8	29.8	36.3	Exchange with marine zone and underground water discharges. Low intensity waves.	Fishing and ecotourism	-88.8924	21.4067	Syringodium filiforme	0.001981		0.001981	0.00727027	Aguayo, C. M. 2004. Estructura de la vegetación acuática sumergida como bioindicador de la calidad del agua en una zona costera tropical. Tesis de Maestría. Centro de Investigación y de Estudios Avanzados del Instituto Politécnico Nacional (CINVESTAV-IPN), Unidad Mérida.Yucatán, México. 113 pp.
ID230	Yucatan Peninsula	Yucatan	Celestun	EST90	Laguna de Celestun	Closed	2800	Mixed semiDiurnal	1.1	760	27.8	38.2	It communicates with the sea through an entrance of 410 m.	Fishing and ecotourism	-90.3878	20.8217	Halodule wrightii	3.5		3.5	12.845	Herrera-Silveira, J. A. 1998. Overview and characterization of the hydrology and primary producer communities of selected coastal lagoons of Yucatán, México. Aquatic Ecosystem Health & Management, 1(3-4), 353-372.
ID231	Yucatan Peninsula	Yucatan	Progreso	EST91	Laguna de Chelem	Closed	1360	Mixed semiDiurnal	Undetermined	444	26.7	35.4	Its connection to the sea is through an artificial mouth at the center of the lagoon	Fishing, tourism and urban development	-89.7338	21.2558	Halodule wrightii	1.75		1.75	6.4225	Herrera-Silveira, J. A. 1998. Overview and characterization of the hydrology and primary producer communities of selected coastal lagoons of Yucatán, México. Aquatic Ecosystem Health & Management, 1(3-4), 353-372.
ID232	Yucatan Peninsula	Yucatan	Progreso	EST92	Laguna de Chelem	Closed	1360	Mixed semiDiurnal	Undetermined	444	26.7	35.4	Its connection to the sea is through an artificial mouth at the center of the lagoon	Fishing, tourism and urban development	-89.7338	21.2558	Thalassia testudinum	1.75		1.75	6.4225	Herrera-Silveira, J. A. 1998. Overview and characterization of the hydrology and primary producer communities of selected coastal lagoons of Yucatán, México. Aquatic Ecosystem Health & Management, 1(3-4), 353-372.
ID233	Yucatan Peninsula	Yucatan	Dzilam de Bravo	EST93	Laguna de Dzilam	Closed	940	Diurnal	1.2	601.8	31	26.5	Exchange with marine zone and underground water discharges. Low intensity waves.	Fishing and ecotourism	-88.6457	21.474	Ruppia maritima	3.5		3.5	12.845	Herrera-Silveira, J. A. 1998. Overview and characterization of the hydrology and primary producer communities of selected coastal lagoons of Yucatán, México. Aquatic Ecosystem Health & Management, 1(3-4), 353-372.
ID234	Yucatan Peninsula	Yucatan	Dzilam de Bravo	EST94	Laguna de Dzilam	Closed	940	Diurnal	1.2	601.8	31	26.5	Exchange with marine zone and underground water discharges. Low intensity waves.	Fishing and ecotourism	-88.6457	21.474	Halodule wrightii	3.5		3.5	12.845	Herrera-Silveira, J. A. 1998. Overview and characterization of the hydrology and primary producer communities of selected coastal lagoons of Yucatán, México. Aquatic Ecosystem Health & Management, 1(3-4), 353-372.
ID235	Yucatan Peninsula	Yucatan	Rio Lagartos	EST95	Laguna Rio Lagartos	Closed	9600	Diurnal	1.98	683.9	27.3	29.7	Communication with the Gulf of Mexico through Dos Bocas.	Fishing and ecotourism	-87.85	21.5667	Halodule wrightii	1.75		1.75	6.4225	Herrera-Silveira, J. A. 1998. Overview and characterization of the hydrology and primary producer communities of selected coastal lagoons of Yucatán, México. Aquatic Ecosystem Health & Management, 1(3-4), 353-372.
ID236	Yucatan Peninsula	Yucatan	Rio Lagartos	EST96	Laguna Rio Lagartos	Closed	9600	Diurnal	1.98	683.9	27.3	29.7	Communication with the Gulf of Mexico through Dos Bocas.	Fishing and ecotourism	-87.85	21.5667	Ruppia maritima	1.75		1.75	6.4225	Herrera-Silveira, J. A. 1998. Overview and characterization of the hydrology and primary producer communities of selected coastal lagoons of Yucatán, México. Aquatic Ecosystem Health & Management, 1(3-4), 353-372.
ID237	Yucatan Peninsula	Yucatan	Rio Lagartos	EST97	Laguna Rio Lagartos	Closed	9600	Diurnal	1.98	683.9	27.3	29.7	Communication with the Gulf of Mexico through Dos Bocas.	Fishing and ecotourism	-87.85	21.5667	Halodule wrightii	4.28837	271.741	276.029	1013.03	Datos del Laboratorio de Producción Primaria del CINVESTAV-IPN Unidad Mérida
ID238	Yucatan Peninsula	Yucatan	Dzilam de Bravo	EST98	Laguna de Dzilam	Closed	940	Diurnal	1.2	601.8	31	26.5	Exchange with marine zone and underground water discharges. Low intensity waves.	Fishing and ecotourism	-88.6457	21.474	Halodule wrightii	1.81475	183.773	185.587	681.105	Datos del Laboratorio de Producción Primaria del CINVESTAV-IPN Unidad Mérida
ID239	Yucatan Peninsula	Yucatan	Progreso	EST99	Laguna de Chelem	Closed	1360	Mixed semiDiurnal	Undetermined	444	26.7	35.4	Its connection to the sea is through an artificial mouth at the center of the lagoon	Fishing, tourism and urban development	-89.7338	21.2558	Halodule wrightii	2.9435	51.8024	54.7459	200.917	Datos del Laboratorio de Producción Primaria del CINVESTAV-IPN Unidad Mérida
ID240	Yucatan Peninsula	Quintana Roo	Sian ka'an	ASC01	ASCENCION	Closed	undetermined	undetermined	Undetermined	Undetermined	Undetermined	Undetermined	Undetermined	Undetermined	-87.4991	19.69	Halodule wrightii	0.104858	228.156	228.314	837.913	Datos del Laboratorio de Producción Primaria del CINVESTAV-IPN Unidad Mérida
ID241	Yucatan Peninsula	Campeche	Campeche-isla arenas	PETE01	PETENES	Open	undetermined	undetermined	Undetermined	Undetermined	Undetermined	40	Undetermined	Undetermined	-90.565	19.986	Syringodium filiforme	0.278018	104.976	106.972	392.587	Datos del Laboratorio de Producción Primaria del CINVESTAV-IPN Unidad Mérida
ID242	Yucatan Peninsula	Campeche	Campeche-isla arenas	PETE02	PETENES	Open	undetermined	undetermined	Undetermined	Undetermined	Undetermined	39	Undetermined	Undetermined	-90.5681	19.9788	Thalassia testudinum	0.337662	132.747	137.304	503.906	Datos del Laboratorio de Producción Primaria del CINVESTAV-IPN Unidad Mérida
ID243	Yucatan Peninsula	Campeche	Campeche-isla arenas	PETE03	PETENES	Open	undetermined	undetermined	Undetermined	Undetermined	Undetermined	43	Undetermined	Undetermined	-90.586	19.9999	Syringodium filiforme	0.258778	148.617	150.937	553.939	Datos del Laboratorio de Producción Primaria del CINVESTAV-IPN Unidad Mérida
ID244	Yucatan Peninsula	Campeche	Campeche-isla arenas	PETE04	PETENES	Open	undetermined	undetermined	Undetermined	Undetermined	Undetermined	39	Undetermined	Undetermined	-90.5942	19.985	Thalassia testudinum	0.119288	127.965	129.274	474.434	Datos del Laboratorio de Producción Primaria del CINVESTAV-IPN Unidad Mérida
ID245	Yucatan Peninsula	Campeche	Ciudad del Carmen	TERMIN01	TERMINOS	Closed	undetermined	undetermined	Undetermined	Undetermined	Undetermined	42	Undetermined	Undetermined	-91.705	18.6546	Halodule wrightii	0.166426	154.801	155.922	572.232	Datos del Laboratorio de Producción Primaria del CINVESTAV-IPN Unidad Mérida
ID246	Yucatan Peninsula	Campeche	Ciudad del Carmen	TERMIN02	TERMINOS	Closed	undetermined	undetermined	Undetermined	Undetermined	Undetermined	40	Undetermined	Undetermined	-91.6892	18.6437	Thalassia testudinum	0.362674	145.777	147.69	542.022	Datos del Laboratorio de Producción Primaria del CINVESTAV-IPN Unidad Mérida
ID247	Yucatan Peninsula	Campeche	Ciudad del Carmen	TERMIN03	TERMINOS	Closed	undetermined	undetermined	Undetermined	Undetermined	Undetermined	Undetermined	Undetermined	Undetermined	-91.5881	18.735	Halodule wrightii	0.214526	99.9808	101.349	371.95	Datos del Laboratorio de Producción Primaria del CINVESTAV-IPN Unidad Mérida
ID248	Yucatan Peninsula	Campeche	Ciudad del Carmen	TERMIN04	TERMINOS	Closed	undetermined	undetermined	Undetermined	Undetermined	Undetermined	41	Undetermined	Undetermined	-91.598	18.7166	Thalassia testudinum	0.26936	161.388	162.705	597.129	Datos del Laboratorio de Producción Primaria del CINVESTAV-IPN Unidad Mérida
ID249	Yucatan Peninsula	Campeche	Ciudad del Carmen	TERMIN05	TERMINOS	Closed	undetermined	undetermined	Undetermined	Undetermined	Undetermined	Undetermined	Undetermined	Undetermined	-91.566	18.734	Halodule wrightii	0.12025	87.7333	88.2941	324.039	Datos del Laboratorio de Producción Primaria del CINVESTAV-IPN Unidad Mérida
ID250	Yucatan Peninsula	Campeche	Ciudad del Carmen	TERMIN06	TERMINOS	Closed	undetermined	undetermined	Undetermined	Undetermined	Undetermined	40	Undetermined	Undetermined	-91.5472	18.7356	Halodule wrightii	0.236652	86.3906	87.3016	320.397	Datos del Laboratorio de Producción Primaria del CINVESTAV-IPN Unidad Mérida
ID251	Yucatan Peninsula	Campeche	Ciudad del Carmen	TERMIN07	TERMINOS	Closed	undetermined	undetermined	Undetermined	Undetermined	Undetermined	Undetermined	Undetermined	Undetermined	-91.5585	18.7137	Halodule wrightii	0.746513	239.489	244.131	895.962	Datos del Laboratorio de Producción Primaria del CINVESTAV-IPN Unidad Mérida
ID252	Yucatan Peninsula	Campeche	Ciudad del Carmen	TERMIN08	TERMINOS	Closed	undetermined	undetermined	Undetermined	Undetermined	Undetermined	38	Undetermined	Undetermined	-91.4632	18.8	Thalassia testudinum	0.785955	146.585	150.176	551.146	Datos del Laboratorio de Producción Primaria del CINVESTAV-IPN Unidad Mérida
ID253	Yucatan Peninsula	Campeche	Ciudad del Carmen	TERMIN09	TERMINOS	Closed	undetermined	undetermined	Undetermined	Undetermined	Undetermined	41	Undetermined	Undetermined	-91.476	18.7851	Thalassia testudinum	0.31746	198.535	200.693	736.543	Datos del Laboratorio de Producción Primaria del CINVESTAV-IPN Unidad Mérida
ID254	Yucatan Peninsula	Campeche	Ciudad del Carmen	TERMIN10	TERMINOS	Closed	undetermined	undetermined	Undetermined	Undetermined	Undetermined	37	Undetermined	Undetermined	-91.4605	18.7554	Halodule wrightii	0.126984	205.806	206.948	759.498	Datos del Laboratorio de Producción Primaria del CINVESTAV-IPN Unidad Mérida
ID255	Yucatan Peninsula	Campeche	Ciudad del Carmen	TERMIN11	TERMINOS	Closed	undetermined	undetermined	Undetermined	Undetermined	Undetermined	39	Undetermined	Undetermined	-91.4411	18.8102	Thalassia testudinum	0.601251	88.9789	93.3137	342.461	Datos del Laboratorio de Producción Primaria del CINVESTAV-IPN Unidad Mérida
ID256	Yucatan Peninsula	Campeche	Ciudad del Carmen	TERMIN12	TERMINOS	Closed	undetermined	undetermined	Undetermined	Undetermined	Undetermined	30	Undetermined	Undetermined	-91.4321	18.7915	Halodule wrightii	0.454064	168.999	172.03	631.351	Datos del Laboratorio de Producción Primaria del CINVESTAV-IPN Unidad Mérida
ID257	Yucatan Peninsula	Campeche	Ciudad del Carmen	TERMIN13	TERMINOS	Closed	undetermined	undetermined	Undetermined	Undetermined	Undetermined	Undetermined	Undetermined	Undetermined	-91.4087	18.8121	Halodule wrightii	0.0933141	181.348	182.095	668.289	Datos del Laboratorio de Producción Primaria del CINVESTAV-IPN Unidad Mérida
ID258	Yucatan Peninsula	Campeche	Campeche-isla arenas	PETE05	PETENES	Open	undetermined	undetermined	Undetermined	Undetermined	Undetermined	40	Undetermined	Undetermined	-90.5824	19.9004	Syringodium filiforme	0.128908	59.6835	60.5147	222.089	Datos del Laboratorio de Producción Primaria del CINVESTAV-IPN Unidad Mérida
ID259	Yucatan Peninsula	Campeche	Campeche-isla arenas	PETE06	PETENES	Open	undetermined	undetermined	Undetermined	Undetermined	Undetermined	46	Undetermined	Undetermined	-90.5676	19.9354	Syringodium filiforme	0.10101	76.4596	78.3105	287.4	Datos del Laboratorio de Producción Primaria del CINVESTAV-IPN Unidad Mérida
ID260	Yucatan Peninsula	Campeche	Campeche-isla arenas	PETE07	PETENES	Open	undetermined	undetermined	Undetermined	Undetermined	Undetermined	39	Undetermined	Undetermined	-90.5973	19.9407	Syringodium filiforme	0.247234	70.6885	72.4846	266.018	Datos del Laboratorio de Producción Primaria del CINVESTAV-IPN Unidad Mérida
ID261	Yucatan Peninsula	Campeche	Campeche-isla arenas	PETE08	PETENES	Open	undetermined	undetermined	Undetermined	Undetermined	Undetermined	42	Undetermined	Undetermined	-90.5604	20.1426	Syringodium filiforme		92.9602	93.4932	343.12	Datos del Laboratorio de Producción Primaria del CINVESTAV-IPN Unidad Mérida
ID262	Yucatan Peninsula	Campeche	Campeche-isla arenas	PETE09	PETENES	Open	undetermined	undetermined	Undetermined	Undetermined	Undetermined	45	Undetermined	Undetermined	-90.5629	20.3433	Syringodium filiforme	1.23329	130.178	133.143	488.633	Datos del Laboratorio de Producción Primaria del CINVESTAV-IPN Unidad Mérida
ID263	Yucatan Peninsula	Campeche	Campeche-isla arenas	PETE10	PETENES	Open	undetermined	undetermined	Undetermined	Undetermined	Undetermined	43	Undetermined	Undetermined	-90.5381	20.4375	Thalassia testudinum	0.329966	175.904	184.083	675.585	Datos del Laboratorio de Producción Primaria del CINVESTAV-IPN Unidad Mérida
ID264	Yucatan Peninsula	Campeche	Campeche-isla arenas	PETE11	PETENES	Open	undetermined	undetermined	Undetermined	Undetermined	Undetermined	Undetermined	Undetermined	Undetermined	-90.5532	20.4506	Syringodium filiforme	0.0769601	137.369	137.811	505.767	Datos del Laboratorio de Producción Primaria del CINVESTAV-IPN Unidad Mérida
ID265	Yucatan Peninsula	Campeche	Campeche-isla arenas	PETE12	PETENES	Open	undetermined	undetermined	Undetermined	Undetermined	Undetermined	45	Undetermined	Undetermined	-90.5635	20.5007	Syringodium filiforme	0.01924	94.0149	94.4266	346.546	Datos del Laboratorio de Producción Primaria del CINVESTAV-IPN Unidad Mérida
ID266	Yucatan Peninsula	Campeche	Campeche-isla arenas	PETE13	PETENES	Open	undetermined	undetermined	Undetermined	Undetermined	Undetermined	45	Undetermined	Undetermined	-90.5795	20.5052	Halodule wrightii	0.01924	94.0149	94.4266	346.546	Datos del Laboratorio de Producción Primaria del CINVESTAV-IPN Unidad Mérida
ID267	Yucatan Peninsula	Campeche	Campeche-isla arenas	PETE14	PETENES	Open	undetermined	undetermined	Undetermined	Undetermined	Undetermined	39	Undetermined	Undetermined	-90.5676	20.5175	Syringodium filiforme	0.199615	76.6793	77.2493	283.505	Datos del Laboratorio de Producción Primaria del CINVESTAV-IPN Unidad Mérida
ID268	Yucatan Peninsula	Campeche	Campeche-isla arenas	PETE15	PETENES	Open	undetermined	undetermined	Undetermined	Undetermined	Undetermined	40	Undetermined	Undetermined	-90.6113	19.9672	Syringodium filiforme	0.0740741	39.5047	40.4936	148.612	Datos del Laboratorio de Producción Primaria del CINVESTAV-IPN Unidad Mérida
ID269	Yucatan Peninsula	Quintana Roo	Holbox	HOLBO01	YUM BALAM	Closed	undetermined	undetermined	Undetermined	Undetermined	Undetermined	36	Undetermined	Undetermined	-87.4051	21.5048	Thalassia testudinum	0.16354	757.91	758.074	2782.13	Datos del Laboratorio de Producción Primaria del CINVESTAV-IPN Unidad Mérida
ID270	Yucatan Peninsula	Quintana Roo	Holbox	HOLBO02	YUM BALAM	Closed	undetermined	undetermined	Undetermined	Undetermined	Undetermined	45	Undetermined	Undetermined	-87.3865	21.4969	Thalassia testudinum	7.42665	100.579	108.005	396.379	Datos del Laboratorio de Producción Primaria del CINVESTAV-IPN Unidad Mérida
ID271	Yucatan Peninsula	Quintana Roo	Holbox	HOLBO03	YUM BALAM	Closed	undetermined	undetermined	Undetermined	Undetermined	Undetermined	47	Undetermined	Undetermined	-87.4036	21.4621	Thalassia testudinum	2.04858	369.112	371.161	1362.16	Datos del Laboratorio de Producción Primaria del CINVESTAV-IPN Unidad Mérida
ID272	Yucatan Peninsula	Quintana Roo	Holbox	HOLBO04	YUM BALAM	Closed	undetermined	undetermined	Undetermined	Undetermined	Undetermined	50	Undetermined	Undetermined	-87.3742	21.5389	Thalassia testudinum	0.253865	335.987	336.24	1234	Datos del Laboratorio de Producción Primaria del CINVESTAV-IPN Unidad Mérida
ID273	Yucatan Peninsula	Quintana Roo	Holbox	HOLBO05	YUM BALAM	Closed	undetermined	undetermined	Undetermined	Undetermined	Undetermined	Undetermined	Undetermined	Undetermined	-87.3886	21.5285	Thalassia testudinum	1.11881	130.744	131.862	483.935	Datos del Laboratorio de Producción Primaria del CINVESTAV-IPN Unidad Mérida
ID274	Yucatan Peninsula	Quintana Roo	Holbox	HOLBO06	YUM BALAM	Closed	undetermined	undetermined	Undetermined	Undetermined	Undetermined	Undetermined	Undetermined	Undetermined	-87.3794	21.5476	Thalassia testudinum	2.21549	45.3704	47.5858	174.64	Datos del Laboratorio de Producción Primaria del CINVESTAV-IPN Unidad Mérida
ID275	Yucatan Peninsula	Campeche	Ciudad del Carmen	LT04	TERMINOS	Closed	undetermined	undetermined	Undetermined	Undetermined	Undetermined	Undetermined	Undetermined	Undetermined	-91.7019	18.663	Thalassia testudinum	0.630111	189.798	193.353	709.604	Datos del Laboratorio de Producción Primaria del CINVESTAV-IPN Unidad Mérida
ID276	Yucatan Peninsula	Campeche	Ciudad del Carmen	LT05	TERMINOS	Closed	undetermined	undetermined	Undetermined	Undetermined	Undetermined	Undetermined	Undetermined	Undetermined	-91.6974	18.656	Halodule wrightii	0.166426	154.801	155.922	572.232	Datos del Laboratorio de Producción Primaria del CINVESTAV-IPN Unidad Mérida
ID277	Yucatan Peninsula	Campeche	Ciudad del Carmen	LT06	TERMINOS	Closed	undetermined	undetermined	Undetermined	Undetermined	Undetermined	Undetermined	Undetermined	Undetermined	-91.6935	18.648	Thalassia testudinum	0.362674	145.777	147.69	542.022	Datos del Laboratorio de Producción Primaria del CINVESTAV-IPN Unidad Mérida
ID278	Yucatan Peninsula	Campeche	Ciudad del Carmen	LT10	TERMINOS	Closed	undetermined	undetermined	Undetermined	Undetermined	Undetermined	40	Undetermined	Undetermined	-91.5952	18.7293	Thalassia testudinum	0.214526	99.9808	101.349	371.95	Datos del Laboratorio de Producción Primaria del CINVESTAV-IPN Unidad Mérida
ID279	Yucatan Peninsula	Campeche	Ciudad del Carmen	LT10	TERMINOS	Closed	undetermined	undetermined	Undetermined	Undetermined	Undetermined	Undetermined	Undetermined	Undetermined	-91.5952	18.7293	Syringodium filiforme	0.214526	99.9808	101.349	371.95	Datos del Laboratorio de Producción Primaria del CINVESTAV-IPN Unidad Mérida
ID280	Yucatan Peninsula	Campeche	Ciudad del Carmen	LT11	TERMINOS	Closed	undetermined	undetermined	Undetermined	Undetermined	Undetermined	Undetermined	Undetermined	Undetermined	-91.5908	18.7214	Syringodium filiforme	0.26936	161.388	162.705	597.129	Datos del Laboratorio de Producción Primaria del CINVESTAV-IPN Unidad Mérida
ID281	Yucatan Peninsula	Campeche	Ciudad del Carmen	LT13	TERMINOS	Closed	undetermined	undetermined	Undetermined	Undetermined	Undetermined	38	Undetermined	Undetermined	-91.5588	18.7369	Thalassia testudinum	0.12025	87.7333	88.2941	324.039	Datos del Laboratorio de Producción Primaria del CINVESTAV-IPN Unidad Mérida
ID282	Yucatan Peninsula	Campeche	Ciudad del Carmen	LT14	TERMINOS	Closed	undetermined	undetermined	Undetermined	Undetermined	Undetermined	38	Undetermined	Undetermined	-91.5558	18.7299	Thalassia testudinum	0.236652	86.3906	87.3016	320.397	Datos del Laboratorio de Producción Primaria del CINVESTAV-IPN Unidad Mérida
ID283	Yucatan Peninsula	Campeche	Ciudad del Carmen	LT15	TERMINOS	Closed	undetermined	undetermined	Undetermined	Undetermined	Undetermined	40	Undetermined	Undetermined	-91.549	18.718	Syringodium filiforme	0.746513	239.489	244.131	895.962	Datos del Laboratorio de Producción Primaria del CINVESTAV-IPN Unidad Mérida
ID284	Yucatan Peninsula	Campeche	Ciudad del Carmen	LT17	TERMINOS	Closed	undetermined	undetermined	Undetermined	Undetermined	Undetermined	39	Undetermined	Undetermined	-91.4632	18.79	Syringodium filiforme	0.785955	146.585	150.176	551.146	Datos del Laboratorio de Producción Primaria del CINVESTAV-IPN Unidad Mérida
ID285	Yucatan Peninsula	Campeche	Ciudad del Carmen	LT18	TERMINOS	Closed	undetermined	undetermined	Undetermined	Undetermined	Undetermined	38	Undetermined	Undetermined	-91.4636	18.777	Syringodium filiforme	0.31746	198.535	200.693	736.543	Datos del Laboratorio de Producción Primaria del CINVESTAV-IPN Unidad Mérida
ID286	Yucatan Peninsula	Campeche	Ciudad del Carmen	LT19	TERMINOS	Closed	undetermined	undetermined	Undetermined	Undetermined	Undetermined	37	Undetermined	Undetermined	-91.4643	18.763	Thalassia testudinum	0.126984	205.806	206.948	759.498	Datos del Laboratorio de Producción Primaria del CINVESTAV-IPN Unidad Mérida
ID287	Yucatan Peninsula	Campeche	Ciudad del Carmen	LT20	TERMINOS	Closed	undetermined	undetermined	Undetermined	Undetermined	Undetermined	38	Undetermined	Undetermined	-91.4323	18.829	Thalassia testudinum	0.597403	212.716	217.191	797.09	Datos del Laboratorio de Producción Primaria del CINVESTAV-IPN Unidad Mérida
ID288	Yucatan Peninsula	Campeche	Ciudad del Carmen	LT21	TERMINOS	Closed	undetermined	undetermined	Undetermined	Undetermined	Undetermined	37	Undetermined	Undetermined	-91.4325	18.815	Halodule wrightii	0.601251	88.9789	93.3137	342.461	Datos del Laboratorio de Producción Primaria del CINVESTAV-IPN Unidad Mérida
ID289	Yucatan Peninsula	Campeche	Ciudad del Carmen	LT22	TERMINOS	Closed	undetermined	undetermined	Undetermined	Undetermined	Undetermined	40	Undetermined	Undetermined	-91.4331	18.802	Thalassia testudinum	0.454064	168.999	172.03	631.351	Datos del Laboratorio de Producción Primaria del CINVESTAV-IPN Unidad Mérida
ID290	Yucatan Peninsula	Campeche	Ciudad del Carmen	LT24	TERMINOS	Closed	undetermined	undetermined	Undetermined	Undetermined	Undetermined	42	Undetermined	Undetermined	-91.3963	18.8164	Thalassia testudinum	0.0933141	181.348	182.095	668.289	Datos del Laboratorio de Producción Primaria del CINVESTAV-IPN Unidad Mérida
ID291	Yucatan Peninsula	Campeche	Ciudad del Carmen	LT25	TERMINOS	Closed	undetermined	undetermined	Undetermined	Undetermined	Undetermined	Undetermined	Undetermined	Undetermined	-91.3941	18.8324	Halodule wrightii	0.0567581	141.299	142.013	521.186	Datos del Laboratorio de Producción Primaria del CINVESTAV-IPN Unidad Mérida
ID292	Yucatan Peninsula	Campeche	Ciudad del Carmen	LT26	TERMINOS	Closed	undetermined	undetermined	Undetermined	Undetermined	Undetermined	Undetermined	Undetermined	Undetermined	-91.4047	18.8365	Thalassia testudinum	1.31121	50.828	55.689	204.379	Datos del Laboratorio de Producción Primaria del CINVESTAV-IPN Unidad Mérida
ID293	Yucatan Peninsula	Campeche	Ciudad del Carmen	LT27	TERMINOS	Closed	undetermined	undetermined	Undetermined	Undetermined	Undetermined	Undetermined	Undetermined	Undetermined	-91.389	18.7897	Thalassia testudinum	0.803271	203.271	207.538	761.663	Datos del Laboratorio de Producción Primaria del CINVESTAV-IPN Unidad Mérida
ID294	Yucatan Peninsula	Campeche	Campeche-isla arenas	T01_M03	PETENES	Open	undetermined	undetermined	Undetermined	Undetermined	Undetermined	38	Undetermined	Undetermined	-90.4937	19.8998	Thalassia testudinum	0.282924	58.3887	64.8361	237.948	Datos del Laboratorio de Producción Primaria del CINVESTAV-IPN Unidad Mérida
ID295	Yucatan Peninsula	Campeche	Campeche-isla arenas	T01_M04	PETENES	Open	undetermined	undetermined	Undetermined	Undetermined	Undetermined	40	Undetermined	Undetermined	-90.4996	19.899	Thalassia testudinum	1.28677	43.0964	50.4197	185.04	Datos del Laboratorio de Producción Primaria del CINVESTAV-IPN Unidad Mérida
ID296	Yucatan Peninsula	Campeche	Campeche-isla arenas	T01_M05	PETENES	Open	undetermined	undetermined	Undetermined	Undetermined	Undetermined	42	Undetermined	Undetermined	-90.5125	19.9001	Thalassia testudinum	0.154882	91.9982	92.8554	340.779	Datos del Laboratorio de Producción Primaria del CINVESTAV-IPN Unidad Mérida
ID297	Yucatan Peninsula	Campeche	Campeche-isla arenas	T01_M06	PETENES	Open	undetermined	undetermined	Undetermined	Undetermined	Undetermined	42	Undetermined	Undetermined	-90.5189	19.8995	Thalassia testudinum	0.0836941	65.7538	66.7447	244.953	Datos del Laboratorio de Producción Primaria del CINVESTAV-IPN Unidad Mérida
ID298	Yucatan Peninsula	Campeche	Campeche-isla arenas	T01_M07	PETENES	Open	undetermined	undetermined	Undetermined	Undetermined	Undetermined	40	Undetermined	Undetermined	-90.5592	19.9007	Thalassia testudinum	0.127946	88.6942	91.0348	334.098	Datos del Laboratorio de Producción Primaria del CINVESTAV-IPN Unidad Mérida
ID299	Yucatan Peninsula	Campeche	Campeche-isla arenas	T01_M08	PETENES	Open	undetermined	undetermined	Undetermined	Undetermined	Undetermined	Undetermined	Undetermined	Undetermined	-90.5915	19.9018	Thalassia testudinum	0.128908	59.6835	60.5147	222.089	Datos del Laboratorio de Producción Primaria del CINVESTAV-IPN Unidad Mérida
ID300	Yucatan Peninsula	Campeche	Campeche-isla arenas	T02_M03	PETENES	Open	undetermined	undetermined	Undetermined	Undetermined	Undetermined	44	Undetermined	Undetermined	-90.4916	19.9419	Thalassia testudinum	0.133718	67.0837	69.6801	255.726	Datos del Laboratorio de Producción Primaria del CINVESTAV-IPN Unidad Mérida
ID301	Yucatan Peninsula	Campeche	Campeche-isla arenas	T02_M04	PETENES	Open	undetermined	undetermined	Undetermined	Undetermined	Undetermined	45	Undetermined	Undetermined	-90.5033	19.9422	Thalassia testudinum	0.46657	41.1225	46.9234	172.209	Datos del Laboratorio de Producción Primaria del CINVESTAV-IPN Unidad Mérida
ID302	Yucatan Peninsula	Campeche	Campeche-isla arenas	T02_M05	PETENES	Open	undetermined	undetermined	Undetermined	Undetermined	Undetermined	40	Undetermined	Undetermined	-90.5203	19.9424	Thalassia testudinum	0.0808081	80.7921	82.6017	303.148	Datos del Laboratorio de Producción Primaria del CINVESTAV-IPN Unidad Mérida
ID303	Yucatan Peninsula	Campeche	Campeche-isla arenas	T02_M06	PETENES	Open	undetermined	undetermined	Undetermined	Undetermined	Undetermined	41	Undetermined	Undetermined	-90.5287	19.9425	Thalassia testudinum	0.133718	46.8172	48.1371	176.663	Datos del Laboratorio de Producción Primaria del CINVESTAV-IPN Unidad Mérida
ID304	Yucatan Peninsula	Campeche	Campeche-isla arenas	T02_M07	PETENES	Open	undetermined	undetermined	Undetermined	Undetermined	Undetermined	42	Undetermined	Undetermined	-90.5379	19.9428	Thalassia testudinum	0.4329	78.8468	84.2244	309.104	Datos del Laboratorio de Producción Primaria del CINVESTAV-IPN Unidad Mérida
ID305	Yucatan Peninsula	Campeche	Campeche-isla arenas	T02_M08	PETENES	Open	undetermined	undetermined	Undetermined	Undetermined	Undetermined	45	Undetermined	Undetermined	-90.5686	19.9458	Thalassia testudinum	0.10101	76.4596	78.3105	287.4	Datos del Laboratorio de Producción Primaria del CINVESTAV-IPN Unidad Mérida
ID306	Yucatan Peninsula	Campeche	Campeche-isla arenas	T02_M09	PETENES	Open	undetermined	undetermined	Undetermined	Undetermined	Undetermined	42	Undetermined	Undetermined	-90.5735	19.9438	Thalassia testudinum	0.152958	183.401	186.446	684.258	Datos del Laboratorio de Producción Primaria del CINVESTAV-IPN Unidad Mérida
ID307	Yucatan Peninsula	Campeche	Campeche-isla arenas	T02_M10	PETENES	Open	undetermined	undetermined	Undetermined	Undetermined	Undetermined	40	Undetermined	Undetermined	-90.592	19.9435	Syringodium filiforme	0.247234	70.6885	72.4846	266.018	Datos del Laboratorio de Producción Primaria del CINVESTAV-IPN Unidad Mérida
ID308	Yucatan Peninsula	Campeche	Campeche-isla arenas	T02_V01	PETENES	Open	undetermined	undetermined	Undetermined	Undetermined	Undetermined	47	Undetermined	Undetermined	-90.4618	19.9423	Thalassia testudinum	0.3924	76.0772	82.5937	303.119	Datos del Laboratorio de Producción Primaria del CINVESTAV-IPN Unidad Mérida
ID309	Yucatan Peninsula	Campeche	Campeche-isla arenas	T04_M03	PETENES	Open	undetermined	undetermined	Undetermined	Undetermined	Undetermined	39	Undetermined	Undetermined	-90.535	20.0441	Thalassia testudinum	0.176046	151.633	155.618	571.119	Datos del Laboratorio de Producción Primaria del CINVESTAV-IPN Unidad Mérida
ID310	Yucatan Peninsula	Campeche	Campeche-isla arenas	T04_M05	PETENES	Open	undetermined	undetermined	Undetermined	Undetermined	Undetermined	38	Undetermined	Undetermined	-90.588	20.0444	Syringodium filiforme	0.36556	55.3166	57.0751	209.466	Datos del Laboratorio de Producción Primaria del CINVESTAV-IPN Unidad Mérida
ID311	Yucatan Peninsula	Campeche	Campeche-isla arenas	T05_M01	PETENES	Open	undetermined	undetermined	Undetermined	Undetermined	Undetermined	45	Undetermined	Undetermined	-90.483	20.0959	Thalassia testudinum	0.11544	32.0039	32.5811	119.573	Datos del Laboratorio de Producción Primaria del CINVESTAV-IPN Unidad Mérida
ID312	Yucatan Peninsula	Campeche	Campeche-isla arenas	T05_M02	PETENES	Open	undetermined	undetermined	Undetermined	Undetermined	Undetermined	40	Undetermined	Undetermined	-90.4964	20.0961	Thalassia testudinum	0.0894661	35.3917	37.0107	135.829	Datos del Laboratorio de Producción Primaria del CINVESTAV-IPN Unidad Mérida
ID313	Yucatan Peninsula	Campeche	Campeche-isla arenas	T05_M04	PETENES	Open	undetermined	undetermined	Undetermined	Undetermined	Undetermined	42	Undetermined	Undetermined	-90.5144	20.0965	Thalassia testudinum	0.43771	119.146	123.248	452.322	Datos del Laboratorio de Producción Primaria del CINVESTAV-IPN Unidad Mérida
ID314	Yucatan Peninsula	Campeche	Campeche-isla arenas	T05_M08	PETENES	Open	undetermined	undetermined	Undetermined	Undetermined	Undetermined	41	Undetermined	Undetermined	-90.6091	20.0981	Syringodium filiforme	0.42328	11.1929	13.3767	49.0924	Datos del Laboratorio de Producción Primaria del CINVESTAV-IPN Unidad Mérida
ID315	Yucatan Peninsula	Campeche	Campeche-isla arenas	T06_M01	PETENES	Open	undetermined	undetermined	Undetermined	Undetermined	Undetermined	45	Undetermined	Undetermined	-90.4901	20.1363	Thalassia testudinum	0.827321	84.3861	93.2654	342.284	Datos del Laboratorio de Producción Primaria del CINVESTAV-IPN Unidad Mérida
ID316	Yucatan Peninsula	Campeche	Campeche-isla arenas	T06_M02	PETENES	Open	undetermined	undetermined	Undetermined	Undetermined	Undetermined	43	Undetermined	Undetermined	-90.5105	20.1363	Thalassia testudinum	0.030784	43.1464	43.5658	159.887	Datos del Laboratorio de Producción Primaria del CINVESTAV-IPN Unidad Mérida
ID317	Yucatan Peninsula	Campeche	Campeche-isla arenas	T06_M04	PETENES	Open	undetermined	undetermined	Undetermined	Undetermined	Undetermined	39.9	Undetermined	Undetermined	-90.5513	20.1388	Thalassia testudinum		92.9602	93.4932	343.12	Datos del Laboratorio de Producción Primaria del CINVESTAV-IPN Unidad Mérida
ID318	Yucatan Peninsula	Campeche	Campeche-isla arenas	T06_M05	PETENES	Open	undetermined	undetermined	Undetermined	Undetermined	Undetermined	39	Undetermined	Undetermined	-90.5697	20.1387	Thalassia testudinum	0.137566	50.5274	51.8483	190.283	Datos del Laboratorio de Producción Primaria del CINVESTAV-IPN Unidad Mérida
ID319	Yucatan Peninsula	Campeche	Campeche-isla arenas	T07_M02	PETENES	Open	undetermined	undetermined	Undetermined	Undetermined	Undetermined	42	Undetermined	Undetermined	-90.5307	20.1875	Thalassia testudinum	0.0933141	86.5996	88.4101	324.465	Datos del Laboratorio de Producción Primaria del CINVESTAV-IPN Unidad Mérida
ID320	Yucatan Peninsula	Campeche	Campeche-isla arenas	T07_M03	PETENES	Open	undetermined	undetermined	Undetermined	Undetermined	Undetermined	41	Undetermined	Undetermined	-90.6026	20.1856	Syringodium filiforme	0.625301	44.9999	47.5011	174.329	Datos del Laboratorio de Producción Primaria del CINVESTAV-IPN Unidad Mérida
ID321	Yucatan Peninsula	Campeche	Campeche-isla arenas	T08_M03	PETENES	Open	undetermined	undetermined	Undetermined	Undetermined	Undetermined	41	Undetermined	Undetermined	-90.5283	20.2329	Thalassia testudinum	0.016354	118.543	120.512	442.279	Datos del Laboratorio de Producción Primaria del CINVESTAV-IPN Unidad Mérida
ID322	Yucatan Peninsula	Campeche	Campeche-isla arenas	T11_M03	PETENES	Open	undetermined	undetermined	Undetermined	Undetermined	Undetermined	Undetermined	Undetermined	Undetermined	-90.5568	20.367	Thalassia testudinum	1.23329	130.178	133.143	488.633	Datos del Laboratorio de Producción Primaria del CINVESTAV-IPN Unidad Mérida
ID323	Yucatan Peninsula	Campeche	Campeche-isla arenas	T12_M01	PETENES	Open	undetermined	undetermined	Undetermined	Undetermined	Undetermined	40	Undetermined	Undetermined	-90.503	20.4486	Thalassia testudinum	0.555075	98.62	102.448	375.983	Datos del Laboratorio de Producción Primaria del CINVESTAV-IPN Unidad Mérida
ID324	Yucatan Peninsula	Campeche	Campeche-isla arenas	T12_M01	PETENES	Open	undetermined	undetermined	Undetermined	Undetermined	Undetermined	39	Undetermined	Undetermined	-90.503	20.4486	Halodule wrightii	0.555075	98.62	102.448	375.983	Datos del Laboratorio de Producción Primaria del CINVESTAV-IPN Unidad Mérida
ID325	Yucatan Peninsula	Campeche	Campeche-isla arenas	T12_M02	PETENES	Open	undetermined	undetermined	Undetermined	Undetermined	Undetermined	45	Undetermined	Undetermined	-90.529	20.449	Thalassia testudinum	0.329966	175.904	184.083	675.585	Datos del Laboratorio de Producción Primaria del CINVESTAV-IPN Unidad Mérida
ID326	Yucatan Peninsula	Campeche	Campeche-isla arenas	T12_M03	PETENES	Open	undetermined	undetermined	Undetermined	Undetermined	Undetermined	45	Undetermined	Undetermined	-90.5508	20.4493	Thalassia testudinum	0.045214	73.0747	73.4296	269.487	Datos del Laboratorio de Producción Primaria del CINVESTAV-IPN Unidad Mérida
ID327	Yucatan Peninsula	Campeche	Campeche-isla arenas	T12_M03	PETENES	Open	undetermined	undetermined	Undetermined	Undetermined	Undetermined	46	Undetermined	Undetermined	-90.5508	20.4493	Syringodium filiforme	0.045214	73.0747	73.4296	269.487	Datos del Laboratorio de Producción Primaria del CINVESTAV-IPN Unidad Mérida
ID328	Yucatan Peninsula	Campeche	Campeche-isla arenas	T12_M04	PETENES	Open	undetermined	undetermined	Undetermined	Undetermined	Undetermined	40	Undetermined	Undetermined	-90.5653	20.4514	Thalassia testudinum	0.0769601	137.369	137.811	505.767	Datos del Laboratorio de Producción Primaria del CINVESTAV-IPN Unidad Mérida
ID329	Yucatan Peninsula	Campeche	Campeche-isla arenas	T13_M02	PETENES	Open	undetermined	undetermined	Undetermined	Undetermined	Undetermined	41	Undetermined	Undetermined	-90.5132	20.5098	Syringodium filiforme	0.315536	40.1757	42.3191	155.311	Datos del Laboratorio de Producción Primaria del CINVESTAV-IPN Unidad Mérida
ID330	Yucatan Peninsula	Campeche	Campeche-isla arenas	T13_M02	PETENES	Open	undetermined	undetermined	Undetermined	Undetermined	Undetermined	40	Undetermined	Undetermined	-90.5132	20.5098	Syringodium filiforme	0.315536	40.1757	42.3191	155.311	Datos del Laboratorio de Producción Primaria del CINVESTAV-IPN Unidad Mérida
ID331	Yucatan Peninsula	Campeche	Campeche-isla arenas	T13_M06	PETENES	Open	undetermined	undetermined	Undetermined	Undetermined	Undetermined	45	Undetermined	Undetermined	-90.5582	20.5106	Thalassia testudinum	0.01924	94.0149	94.4266	346.546	Datos del Laboratorio de Producción Primaria del CINVESTAV-IPN Unidad Mérida
ID332	Yucatan Peninsula	Campeche	Campeche-isla arenas	T13_M07	PETENES	Open	undetermined	undetermined	Undetermined	Undetermined	Undetermined	40.1	Undetermined	Undetermined	-90.5627	20.5102	Syringodium filiforme	0.0673401	68.186	68.5324	251.514	Datos del Laboratorio de Producción Primaria del CINVESTAV-IPN Unidad Mérida
ID333	Yucatan Peninsula	Campeche	Campeche-isla arenas	T13_M09	PETENES	Open	undetermined	undetermined	Undetermined	Undetermined	Undetermined	37	Undetermined	Undetermined	-90.5866	20.5106	Thalassia testudinum	0.199615	76.6793	77.2493	283.505	Datos del Laboratorio de Producción Primaria del CINVESTAV-IPN Unidad Mérida
ID334	Yucatan Peninsula	Campeche	Campeche-isla arenas	VA_07	PETENES	Open	undetermined	undetermined	Undetermined	Undetermined	Undetermined	46	Undetermined	Undetermined	-90.5422	19.9681	Thalassia testudinum	0.292122	104.022	106.919	392.394	Datos del Laboratorio de Producción Primaria del CINVESTAV-IPN Unidad Mérida
ID335	Yucatan Peninsula	Campeche	Campeche-isla arenas	VA_08	PETENES	Open	undetermined	undetermined	Undetermined	Undetermined	Undetermined	40	Undetermined	Undetermined	-90.6175	19.9672	Thalassia testudinum	0.0740741	39.5047	40.4936	148.612	Datos del Laboratorio de Producción Primaria del CINVESTAV-IPN Unidad Mérida
ID336	Yucatan Peninsula	Quintana Roo	Holbox	YB_Ba01	YUM BALAM	Closed	undetermined	undetermined	Undetermined	Undetermined	Undetermined	35	Undetermined	Undetermined	-87.3937	21.5077	Halodule wrightii	0.16354	757.91	758.074	2782.13	Datos del Laboratorio de Producción Primaria del CINVESTAV-IPN Unidad Mérida
ID337	Yucatan Peninsula	Quintana Roo	Holbox	YB_Ba02	YUM BALAM	Closed	undetermined	undetermined	Undetermined	Undetermined	Undetermined	40	Undetermined	Undetermined	-87.27	21.439	Thalassia testudinum	0.308802	115.753	116.061	425.945	Datos del Laboratorio de Producción Primaria del CINVESTAV-IPN Unidad Mérida
ID338	Yucatan Peninsula	Quintana Roo	Holbox	YB_Ba03	YUM BALAM	Closed	undetermined	undetermined	Undetermined	Undetermined	Undetermined	45	Undetermined	Undetermined	-87.3388	21.534	Thalassia testudinum	3.59788	285.465	289.063	1060.86	Datos del Laboratorio de Producción Primaria del CINVESTAV-IPN Unidad Mérida
ID339	Yucatan Peninsula	Quintana Roo	Holbox	YB_Ba04	YUM BALAM	Closed	undetermined	undetermined	Undetermined	Undetermined	Undetermined	40	Undetermined	Undetermined	-87.3176	21.527	Thalassia testudinum	6.83021	164.045	170.875	627.112	Datos del Laboratorio de Producción Primaria del CINVESTAV-IPN Unidad Mérida
ID340	Yucatan Peninsula	Quintana Roo	Holbox	YB_Ba05	YUM BALAM	Closed	undetermined	undetermined	Undetermined	Undetermined	Undetermined	50	Undetermined	Undetermined	-87.3066	21.5179	Thalassia testudinum	4.27128	266.501	270.772	993.734	Datos del Laboratorio de Producción Primaria del CINVESTAV-IPN Unidad Mérida
ID341	Yucatan Peninsula	Quintana Roo	Holbox	YB_Ba06	YUM BALAM	Closed	undetermined	undetermined	Undetermined	Undetermined	Undetermined	45	Undetermined	Undetermined	-87.3804	21.5002	Syringodium filiforme	7.42665	100.579	108.005	396.379	Datos del Laboratorio de Producción Primaria del CINVESTAV-IPN Unidad Mérida
ID342	Yucatan Peninsula	Quintana Roo	Holbox	YB_Ba07	YUM BALAM	Closed	undetermined	undetermined	Undetermined	Undetermined	Undetermined	45	Undetermined	Undetermined	-87.2813	21.5022	Thalassia testudinum	1.17364	447.871	449.044	1647.99	Datos del Laboratorio de Producción Primaria del CINVESTAV-IPN Unidad Mérida
ID343	Yucatan Peninsula	Quintana Roo	Holbox	YB_Ba08	YUM BALAM	Closed	undetermined	undetermined	Undetermined	Undetermined	Undetermined	37	Undetermined	Undetermined	-87.2928	21.5044	Thalassia testudinum	3.52092	328.223	331.744	1217.5	Datos del Laboratorio de Producción Primaria del CINVESTAV-IPN Unidad Mérida
ID344	Yucatan Peninsula	Quintana Roo	Holbox	YB_Ba09	YUM BALAM	Closed	undetermined	undetermined	Undetermined	Undetermined	Undetermined	38	Undetermined	Undetermined	-87.4966	21.4866	Thalassia testudinum	0.4384	457.454	457.892	1680.47	Datos del Laboratorio de Producción Primaria del CINVESTAV-IPN Unidad Mérida
ID345	Yucatan Peninsula	Quintana Roo	Holbox	YB_Ba10	YUM BALAM	Closed	undetermined	undetermined	Undetermined	Undetermined	Undetermined	40	Undetermined	Undetermined	-87.0935	21.6044	Thalassia testudinum	1.31794	215.357	216.675	795.197	Datos del Laboratorio de Producción Primaria del CINVESTAV-IPN Unidad Mérida
ID346	Yucatan Peninsula	Quintana Roo	Holbox	YB_Ba11	YUM BALAM	Closed	undetermined	undetermined	Undetermined	Undetermined	Undetermined	42	Undetermined	Undetermined	-87.3979	21.4583	Syringodium filiforme	2.04858	369.112	371.161	1362.16	Datos del Laboratorio de Producción Primaria del CINVESTAV-IPN Unidad Mérida
ID347	Yucatan Peninsula	Quintana Roo	Holbox	YB_Ba12	YUM BALAM	Closed	undetermined	undetermined	Undetermined	Undetermined	Undetermined	48	Undetermined	Undetermined	-87.3698	21.4514	Thalassia testudinum	2.82828	372.616	375.445	1377.88	Datos del Laboratorio de Producción Primaria del CINVESTAV-IPN Unidad Mérida
ID348	Yucatan Peninsula	Quintana Roo	Holbox	YB_Ba13	YUM BALAM	Closed	undetermined	undetermined	Undetermined	Undetermined	Undetermined	43	Undetermined	Undetermined	-87.1474	21.4804	Thalassia testudinum	5.33045	299.287	304.617	1117.95	Datos del Laboratorio de Producción Primaria del CINVESTAV-IPN Unidad Mérida
ID349	Yucatan Peninsula	Quintana Roo	Holbox	YB_Ba14	YUM BALAM	Closed	undetermined	undetermined	Undetermined	Undetermined	Undetermined	41	Undetermined	Undetermined	-87.3785	21.5275	Halodule wrightii	0.253865	335.987	336.24	1234	Datos del Laboratorio de Producción Primaria del CINVESTAV-IPN Unidad Mérida
ID350	Yucatan Peninsula	Quintana Roo	Holbox	YB_Ba15	YUM BALAM	Closed	undetermined	undetermined	Undetermined	Undetermined	Undetermined	50	Undetermined	Undetermined	-87.3917	21.5046	Thalassia testudinum	0.482065	368.037	368.519	1352.47	Datos del Laboratorio de Producción Primaria del CINVESTAV-IPN Unidad Mérida
ID351	Yucatan Peninsula	Quintana Roo	Holbox	YB_Ba16	YUM BALAM	Closed	undetermined	undetermined	Undetermined	Undetermined	Undetermined	35	Undetermined	Undetermined	-87.3721	21.499	Thalassia testudinum	0.338007	178.937	179.275	657.94	Datos del Laboratorio de Producción Primaria del CINVESTAV-IPN Unidad Mérida
ID352	Yucatan Peninsula	Quintana Roo	Holbox	YB_Ba17	YUM BALAM	Closed	undetermined	undetermined	Undetermined	Undetermined	Undetermined	39.2	Undetermined	Undetermined	-87.3206	21.5173	Thalassia testudinum	0.182878	166.09	166.273	610.22	Datos del Laboratorio de Producción Primaria del CINVESTAV-IPN Unidad Mérida
ID353	Yucatan Peninsula	Quintana Roo	Holbox	YB_Ba18	YUM BALAM	Closed	undetermined	undetermined	Undetermined	Undetermined	Undetermined	Undetermined	Undetermined	Undetermined	-87.2916	21.5026	Thalassia testudinum	0.237356	34.4025	34.6399	127.128	Datos del Laboratorio de Producción Primaria del CINVESTAV-IPN Unidad Mérida
ID354	Yucatan Peninsula	Quintana Roo	Holbox	YB_Ba19	YUM BALAM	Closed	undetermined	undetermined	Undetermined	Undetermined	Undetermined	Undetermined	Undetermined	Undetermined	-87.2563	21.4959	Thalassia testudinum	0.239779	77.6172	77.857	285.735	Datos del Laboratorio de Producción Primaria del CINVESTAV-IPN Unidad Mérida
ID355	Yucatan Peninsula	Quintana Roo	Holbox	YB_Ba20	YUM BALAM	Closed	undetermined	undetermined	Undetermined	Undetermined	Undetermined	Undetermined	Undetermined	Undetermined	-87.1851	21.4375	Thalassia testudinum	0.163234	139.18	139.343	511.39	Datos del Laboratorio de Producción Primaria del CINVESTAV-IPN Unidad Mérida
ID356	Yucatan Peninsula	Quintana Roo	Holbox	YB_Ba21	YUM BALAM	Closed	undetermined	undetermined	Undetermined	Undetermined	Undetermined	Undetermined	Undetermined	Undetermined	-87.2289	21.4325	Thalassia testudinum	0.20217	273.642	273.844	1005.01	Datos del Laboratorio de Producción Primaria del CINVESTAV-IPN Unidad Mérida
ID357	Yucatan Peninsula	Quintana Roo	Holbox	YB_Ba22	YUM BALAM	Closed	undetermined	undetermined	Undetermined	Undetermined	Undetermined	Undetermined	Undetermined	Undetermined	-87.3805	21.5318	Halodule wrightii	1.11881	130.744	131.862	483.935	Datos del Laboratorio de Producción Primaria del CINVESTAV-IPN Unidad Mérida
ID358	Yucatan Peninsula	Quintana Roo	Holbox	YB_Ba23	YUM BALAM	Closed	undetermined	undetermined	Undetermined	Undetermined	Undetermined	Undetermined	Undetermined	Undetermined	-87.3485	21.5823	Thalassia testudinum	0.465608	151.204	151.669	556.627	Datos del Laboratorio de Producción Primaria del CINVESTAV-IPN Unidad Mérida
ID359	Yucatan Peninsula	Quintana Roo	Holbox	YB_Ba24	YUM BALAM	Closed	undetermined	undetermined	Undetermined	Undetermined	Undetermined	Undetermined	Undetermined	Undetermined	-87.367	21.559	Halodule wrightii	2.21549	45.3704	47.5858	174.64	Datos del Laboratorio de Producción Primaria del CINVESTAV-IPN Unidad Mérida

## Sheet: Metadata
FIELD	DESCRIPTION
ID	Unique and unrepeatable number belonging to a data
REGION	Geographic region. Attributes: North Pacific, Gulf of Mexico, Caribbean.
STATE	State where the sampling was done are, 9 states in total.
LOCATION	Name of the water body or coastal town closest to where the sampling was done.
STATION
SITE	Name of the area within the body of water or specific area of ​​the coast where the sampling was done
TYPE OF ENVIRONMENT	Hydrodynamic type. Classification according to the hydrodynamic exposure. Dynamic attribute (open water) or closed (coastal lagoon, estuary)
EXTENSION (ha)	General extension that refers only to the body of water. Units: Hectares (ha)
TYPE_MAR	Tide is the periodic change of sea level produced mainly by the force of gravitational attraction exerted by the Sun and the Moon on Earth. Type according to the geography of the place and the type of wind that predominates: ATTRIBUTES: Semidiurnas: during the course of a lunar day two high tides and two low tides can be observed. Diurnas: has a high tide and low tide on a lunar day. Mixed: tides…
AMP_MAR (m)	Tidal range is the vertical difference between high tide and low tide. ATTRIBUTES: metric values. Unit: meters. Data obtained from various sources (reports, reports, articles).
PRECIPITATION (mm)	Precipitation is any form of hydrometeor that falls from the atmosphere and reaches the earth's surface. This phenomenon includes rain, drizzle, snow, sleet, hail. Units mm. The information is averages. Data obtained from various sources (reports, reports, articles).
TEMPERATURE	Temperature is the specific heat degree of the body of water. Obtaining average values, ranges or maxima. Units ° C. Data obtained from various sources (reports, reports, articles).
SALINITY	Salinity is the proportional amount of salts contained in seawater and coastal bodies of water. Obtaining average values. Data obtained from various sources (reports, reports, articles).
INFLUENCE	Environmental observations of the body of water. Marine influence or fresh water, etc. Data obtained from various sources.
IMPACT	Impacts refer to the effect produced by human activity on the environment. Attributes: industrial discharges, tourism, fishing, domestic discharges. Data obtained from various sources (reports, reports, articles).
LONGITUD	Location of the body of water. Longitude. They are presented in decimal degrees
LATITUD	Location of the body of water. Latitude. They are presented in decimal degrees
SPECIES	The registered seagrass species. Attributes: Halodule wrightii, Halophila decipiens, Halodule beaudettei, Ruppia maritima, Syringodium filiforme, Thalassia testudinum and Zostera marina
MgC ha_AER	It is the amount of carbon in Megagram of carbon per hectare that seagrasses contain in their aerial part.
MgC ha_SUB	Combined volume of Carbon accumulated in the underground components: live underground biomass and sediment. Unit in Megagram of carbon per hectare.
MgC ha_TOT	It is the total Carbon (AER + SUB) in Megagram of carbon per hectare.
MgCO2eq/ha	Combined volume of Carbon accumulated in the underground and aerial components. CO2eq unit (Megagram of carbon dioxide equivalent per hectare). For this, the amount of Carbon in Mg Corg / ha multiplied by 3.67.
REFERENCE	Publication reference
